## Jumping mechanisms in jumping plant lice (Hemiptera, Sternorrhyncha, Psyllidae)

by

M. Burrows

Department of Zoology, University of Cambridge,  
Cambridge CB2 3EJ, England

With 9 Figures

Keywords: kinematics, locomotion, muscle, Hemiptera

Running Title: Jumping in psyllids

Please send correspondence to Prof M Burrows at the above address

Telephone +44 (0)1223 336628

Fax +44 (0)1223 330934

Email [mb135@hermes.cam.ac.uk](mailto:mb135@hermes.cam.ac.uk)

1  
2

## Summary

3 Jumping mechanisms and performance were analysed in three species of psyllids (Hemiptera,  
4 Sternorrhyncha) that ranged from 2 to 4 mm in body length and from 0.7 to 2.8 mg in weight.  
5 Jumping was propelled by rapid movements of the short hind legs that were only 10-20%  
6 longer than the other legs and 61-77% of body length. Power was provided by large thoracic  
7 muscles that depressed the trochantera so that the two hind legs moved in parallel planes on  
8 either side of the body. These movements accelerated the body to take-off in 0.9 ms in the  
9 smallest psyllid and 1.7 ms in the largest, but in all species imparted a rapid forward rotation  
10 so that at take-off the head pointed downwards, subtending angles of about -60 degrees  
11 relative to the ground. The front legs thus supported the body just before take-off and either  
12 lost contact with the ground at the same time as, or even after the hind legs. In the best jumps  
13 from the horizontal, take-off velocity reached  $2.7 \text{ m s}^{-1}$  and the trajectory was steep at 62 - 80  
14 degrees. Once airborne the body spun rapidly at rates up to 336 Hz in the pitch plane. In  
15 many jumps the wings did not open to provide stabilisation, but some jumps led directly to  
16 sustained flight. In their best jumps the smallest species experienced a force of 637 g. The  
17 largest species had an energy requirement of 13  $\mu\text{J}$ , a power output of 13 mW and exerted a  
18 force of nearly 10 mN. In a rare jumping strategy seen in only 2 of 211 jumps analysed, the  
19 femoro-tibial joints extended further and resulted in the head pointing upwards at take-off  
20 and the spin rate being greatly reduced.

21  
22  
23

## Introduction

24

25 Jumping as a fast means of locomotion or escape is widespread amongst the four sub-orders  
26 of Hemipteran insects, most of which move their hind legs in the same plane beneath the  
27 body, while others including the subjects of this paper, the psyllids, move them along the  
28 sides of the body. Jumping performance reaches its peak in the Auchenorrhyncha; the  
29 froghopper (spittle bug) *Philaenus spumarius* and the planthopper *Issus coleoptratus* have the  
30 best jumping performance of any insect described so far. They accelerate their bodies in less  
31 than 1 ms to a take-off velocity of 4.7 and 5.5  $\text{m s}^{-1}$ , experiencing a force of 550 and 720 g  
32 respectively (Burrows, 2003; Burrows, 2006; Burrows, 2009a). This exceptional performance  
33 is accomplished by a catapult mechanism. Large forces are developed by the slow contraction  
34 of enormous thoracic muscles that store energy by bending paired bow-shaped elements of  
35 the internal skeleton. These energy stores are built of a composite of hard cuticle and the soft  
36 elastic protein resilin (Burrows et al., 2008). Sudden release of the stored energy then powers  
37 the rapid and simultaneous depression of the hind legs (Burrows, 2007b).

38

39 In a second hemipteran sub-order, the basal Coleorrhyncha, at least one wingless species  
40 jumps, but it shows few specialisations for jumping (Burrows et al., 2007). Its hind legs are  
41 only 10% longer than the other legs and their rapid movements accelerate it in 1.5 ms to a  
42 take-off velocity of 1.5  $\text{m s}^{-1}$ . This insect experiences a force of 100 g, and once airborne  
43 rotates about any of the three body axes.

44

45 A third sub-order, the Heteroptera, contains a wide diversity of bugs, but only two families  
46 have species that are reported to jump, and only one of these, the Saldidae or shore bugs has  
47 been investigated in detail (Burrows, 2009b). The hind legs of these bugs are 80% longer

1 than the other legs and in a quarter of all jumps are used as the sole means of accelerating the  
2 body in 4 ms to a take-off velocity of  $1.2 \text{ m s}^{-1}$ . The majority of its jumps are, however,  
3 accompanied by movements of the wings and achieve similar take-off velocities and similar  
4 jumping performance.

5  
6 Jumping abilities of members of a fourth sub-order, the Sternorrhyncha which includes  
7 aphids, coccids and whiteflies, have not been analysed although one group, the Psylloidea or  
8 jumping plant lice, are, as their colloquial name implies, renowned for their jumping. The  
9 group is widespread throughout many parts of the world although individual species  
10 generally feed on the phloem of a particular species of usually dicotyledonous plants. On  
11 many crop species as diverse as carrot, olive, pear and apple they can become a pest, but can  
12 also be beneficial in controlling some alien invasive plants such as broom and mesquite. The  
13 anatomy of the thorax and hind legs of this group has been well described (Crawford, 1914;  
14 Weber, 1929). This paper shows that jumps by three species of psyllids are propelled by the  
15 hind legs, under the control of large trochanteral muscles in the thorax. The jumps are  
16 characterised by an unusual take-off posture in which the head points downwards and the  
17 front tarsi provide support for the body in movement that resembles a human hand stand.  
18 Once airborne the body spins at high rates in the pitch plane. Energy is thus lost to rotation  
19 but the body is nevertheless accelerated rapidly to a take-off velocity of  $2.7 \text{ m s}^{-1}$ . A rarely  
20 used strategy involving more extensive movements of the femoro-tibial joints of the hind  
21 legs, enables take-off with the head up and with a greatly reduced rate of body spin.

## 22 23 24 **Materials and Methods**

25 Three species of psyllids were caught on their host trees in Girton, Cambridge, U.K., in  
26 Ljubljana, Slovenia, and in Aachen, Germany: 1. *Cacopsylla peregrina* (Foerster), from  
27 hawthorn (*Crataegus monogyna*), 2. *Psyllopsis fraxini* (L.) from ash (*Fraxinus excelsior*), 3.  
28 *Psylla alni* (L.) from alder (*Alnus glutinosa*). They all belong to the order Hemiptera, sub-  
29 order Sternorrhyncha and to the family Psyllidae.

30  
31 Sequential images of jumps were captured at  $5000 \text{ frames s}^{-1}$  and with an exposure time of  
32 0.05 ms with a single Photron Fastcam 1024PCI high speed camera (Photron (Europe) Ltd,  
33 West Wycombe, Bucks., UK), fitted with a 60 mm Nikon lens. The images were fed directly  
34 to a laptop computer. The jumps either occurred spontaneously or after the psyllids had been  
35 manoeuvred with a fine paint brush toward the middle of a glass chamber which measured 80  
36 mm wide, 40 mm tall, and 10 mm deep at floor level, widening to 25 mm at the top. The floor  
37 was of high density foam. Some jumps were also captured from vertically placed pieces of  
38 the same foam. The camera pointed at the centre of this chamber. A psyllid was able to jump  
39 in any direction. Detailed measurements of changes in joint angles and distances moved were  
40 made from jumps that were parallel to the image plane of the camera, or as close as possible  
41 to this plane. Jumps that deviated to either side of the image plane of the camera by up to  
42  $\pm 30^\circ$  would result in a maximum error of 10% in the measurements of leg joint, or body  
43 angles. Sequences of images were analysed with Motionscope camera software (Redlake  
44 Imaging, Tucson, AZ, USA), or with Canvas 12 (ACD Systems of America, Miami, FL,  
45 USA). The time at which the legs lost contact with the ground and the psyllid became  
46 airborne was designated as  $t = 0 \text{ ms}$ , thus allowing different jumps by the same or different  
47 psyllids to be compared. The time at which the hind legs started to move and propel the jump  
48 was also labelled and the time between these two events defined the period over which the

1 body was accelerated in a jump. A one frame error in estimating both the first movement of  
2 the hind legs and the take-off time would result in a 10 % error in measuring acceleration  
3 time. Peak velocity was calculated as the distance moved in a rolling 3 point average of  
4 successive frames captured at 0.2 ms intervals before take-off. The point on the body  
5 measured was close to the centre of mass just behind the hind legs. Movies 1 and 2 of jumps  
6 are included as supplementary material.

7  
8 The anatomy of the hind legs and metathorax was examined in intact psyllids and in those  
9 preserved in 70% alcohol, or in 50% glycerol. Drawings of the legs, joints and muscles were  
10 made with the aid of a drawing tube attached to a Leica MZ16 stereo microscope (Wetzlar,  
11 Germany). Individual colour photographs were taken with a Nikon DXM1200 digital camera  
12 attached to the same microscope. Dried specimens were also mounted on specimen holders,  
13 sputter coated with gold and then examined in a Philips XL-30 scanning electron microscope  
14 (Philips, Eindhoven, The Netherlands). Lengths of the parts of the legs of fixed specimens  
15 were measured to an accuracy of 0.1 mm on images captured with a digital camera attached  
16 to a Leica MZ16 microscope and projected onto a 24" monitor. Body weights were  
17 determined to an accuracy of 0.1 mg with a Mettler Toledo AB104 balance (Beaumont Leys,  
18 Leicester, UK).

19  
20 A total of 211 jumps by 41 psyllids were captured and analysed; 113 jumps by 17 hawthorn  
21 psyllids (*Cacopsylla*), 32 jumps by 5 ash psyllids (*Psyllopsis*) and 66 jumps by 19 alder  
22 psyllids (*Psylla*). Measurements of body weight were made on these psyllids and on other  
23 members of the same species whose jumps were not recorded. Measurements are given as  
24 means  $\pm$  standard error of the mean (s.e.m.). Temperatures in all experiments ranged from 23-  
25 26° C.

## 26 Results

### 27 Body shape

28 All three species of psyllids analysed had a similar body shape with large translucent front  
29 wings held to form a roof covering the thorax and abdomen and extending beyond the tip of  
30 the abdomen (Fig. 1A,B). The body was slung low to the ground and supported by legs  
31 placed on the ground to either side of the body. *Cacopsylla* was the smallest, with a body  
32 length of  $1.9 \pm 0.1$  mm (mean  $\pm$  s.e.m, N = 13) and a body weight of  $0.7 \pm 0.03$  mg (N = 35).  
33 *Psylla* was the largest, with a body of twice the length of the other two species, at  $4.0 \pm 0.3$   
34 mm (N = 7) and of almost 4 times greater weight at  $2.8 \pm 0.1$  mg (N = 29) than *Cacopsylla*  
35 (Table 1). *Psyllopsis* had a body only 10% longer than *Cacopsylla*, at  $2.2 \pm 0.1$  mm (N = 7),  
36 but a body weight 62% greater at  $1.2 \pm 0.1$  mg (N = 19).

### 37 Structure of the hind legs

38 In *Cacopsylla* the hind legs were only 10% longer than the front and middle legs, giving a  
39 ratio of leg lengths of 1 front: 1 middle: 1.1 hind (Table 1). In *Psylla* and *Psyllopsis* the hind  
40 legs were 20% longer than the front and middle legs, giving a ratio of leg lengths of 1: 1: 1.2.  
41 In *Cacopsylla* the hind tibia was the same length as the hind femur, but in *Psylla* it was 25%  
42 longer and in *Psyllopsis* it was 50% longer. Relative to the length of the body, the hind legs  
43 were also short, ranging from 61% of body length in *Psylla*, 66% in *Cacopsylla*, and to 76%  
44 in *Psyllopsis*. Relative to the cube root of body weight the ratio of the hind leg lengths had a  
45 similar ratio ranging from 1.5 – 1.7.

46  
47

1 The two large hind coxae were closely apposed at the midline and did not move visibly  
2 relative to the metathorax during jumping (Figs 2,3). By contrast, the small trochanter rotated  
3 through some 220 degrees about the coxa and swung the hind leg from its fully levated  
4 position before a jump (Fig. 2A) to its fully depressed position after take-off (Figs 2B,C, 3B).  
5 In its fully levated position, the hind femur fitted into a groove in the coxa at the side of the  
6 body and abutted anteriorly with the trochantin (Figs 1A, 3). At its fully depressed position,  
7 the hind tibia and tarsus projected anteriorly in front of the head. A pointed protrusion, the  
8 meracanthus (Figs 2A, B-D, 3) projected posteriorly and ventrally from the coxa, but did not  
9 appear to engage with any part of the hind leg during these movements. The femur rotated  
10 through a small angle about the trochanter; the tibia through some 110 degrees about the  
11 femur, and the tarsus through some 70 degrees about the tibia. Ventrally-pointing spines were  
12 present on the distal tibia at the tibio-tarsal joint that could increase traction with the surface  
13 from which a psyllid jumps.

14  
15 Depression of the trochanter was powered by large muscles located in the metathorax (Fig.  
16 2D). The muscles arise from the dorsal and anterior walls of the metathorax and insert within  
17 the thorax on a large, stiff tendon that runs through the coxa to insert on the medial, ventral  
18 rim of the trochanter (Fig. 2D).

19 A number of hair fields are placed such that they could provide proprioceptive information  
20 about the movement or position of a hind leg (Fig. 3). On the ventral surface of the hind  
21 coxae were two symmetrically-placed fields which would be contacted by a hind femur when  
22 it was levated (Fig. 3A). Each field consisted of numerous articulated hairs 25-50  $\mu\text{m}$  in  
23 length and thus much shorter than the sparse 500  $\mu\text{m}$  trichoid sensillum located nearby on the  
24 femur (inset in Fig. 3A). These fields were exposed when the hind legs were depressed (Fig.  
25 3B) revealing the gradation in length of their constituent hairs. When levated, a hind leg also  
26 engaged with a hair field on the lateral surface of the coxa that again consisted of a large  
27 number of short hairs (Fig. 3 B, C). On the ventral and posterior part of the trochantin was  
28 another hair field which would be contacted by the hind femur in advance of the jump (Fig.  
29 3A, C). Together these hair fields should be able to signal the initial levated position of a hind  
30 leg before a jump and its depressed position once a jump has been propelled.

### 31 **Kinematics of the jump**

32 The following description is of jumping by *Psylla*, the largest of the psyllids studied (Figs 4,  
33 6) with further characteristics illustrated by the other two species (Figs 5, 7). The key feature  
34 of the jump was that the propulsive movements of the hind legs rotated the head downwards  
35 so that the front legs were often the final means of support. This posture at take-off resulted  
36 in high rates of spin in the pitch plane once airborne (Figs 4-6. Movie 1, supplementary  
37 material). Before a jump, both hind legs were fully levated so that the anterior edge of each  
38 femur is pressed against the associated trochantin. The body was held at an angle of about  
39 +20 degrees relative to the horizontal so that the tip of the abdomen was close to the ground  
40 and the head was raised by the front and middle legs (Fig. 4; see diagram on first frame). The  
41 first observable movement of a hind leg was depression of the trochanter about the coxa  
42 which resulted in the progressive downward movement of the femur (Movie 2,  
43 supplementary material). Initially the angle between the femur and the tibia did not change,  
44 but as the rotation of the trochanter continued, then from 0.4 ms before take-off, the tibia did  
45 begin to extend. At take-off the tibia was almost fully extended about the femur and the angle  
46 of the body relative to the horizontal was  $-76 \pm 6$  degrees (Table 2, Fig. 4; see diagram on  
47 frame 0 ms) with the head pointing downwards. During the 2.4 ms acceleration period in this  
48 jump the angular rotation of the body was therefore  $40,000 \text{ degrees s}^{-1}$ . The middle legs were  
49 the first to lose contact with the ground between 0.6 and 0.4 ms before take-off. The forward

1 pitch of the body was so great that the front legs supported the body until take-off. The  
2 angular movements of the joints of the front legs indicated that they were providing balance  
3 rather than thrust to the jump. Take-off was marked by the front and hind legs losing contact  
4 with the ground at about the same time. After take-off, rapid rotation of the body continued in  
5 the pitch plane.

6  
7 Three jumps by the same psyllid *Cacopsylla* viewed from the side (Fig. 5A), from in front as  
8 it jumped toward the camera (Fig. 5B), and from underneath as it jumped from the vertical  
9 glass wall of the chamber (Fig. 5C) illustrate further features of the sequence of leg  
10 movements. Before the jump, the tarsi of the hind legs were placed lateral to the body and  
11 remained in that position as they transmitted the force generated by the trochanteral muscles  
12 in the thorax to the ground. The rotation of the trochantera resulted in the femoro-tibial joints  
13 of the two hind legs moving medially and thus closer to each other so that they came to lie  
14 underneath the body (Fig. 5C). The body was pitched forwards at even higher angular  
15 rotation rates of  $145,000 \text{ degrees s}^{-1}$  during the much shorter (0.6 ms long) acceleration  
16 period. Take-off was again marked by the front and hind legs losing contact with the ground  
17 at about the same time. In all species the body always pointed downwards at take-off with the  
18 head close to the ground and the abdomen raised in the air. Body angles at take-off were  
19 similar in all species ranging from  $-58 \pm 3$  degrees in *Psyllopsis* (mean of means of 19 jumps  
20 by 5 psyllids),  $-61 \pm 5$  degrees in *Cacopsylla* (mean of means of 40 jumps by 8 psyllids), to  
21  $-66 \pm 3$  degrees in *Psylla* (mean of means of 32 jumps by 7 psyllids) (Table 2). The numbers  
22 of jumps and animals given here also apply to subsequent data.

23  
24 The time taken to accelerate to take-off was related to the body weight of a particular species  
25 of psyllid. In the lightest species, *Cacopsylla*, the acceleration time was shortest with a mean  
26 of  $0.9 \pm 0.3$  ms and with a fastest acceleration of only 0.4 ms in the best jump recorded. In  
27 *Psyllopsis* the time rose to  $1.2 \pm 0.2$  ms (fastest 0.8 ms) and in the heaviest species, *Psylla*,  
28 acceleration took almost twice as long as in *Cacopsylla* at  $1.7 \pm 0.2$  ms (fastest 1.0 ms) (Table  
29 2). By contrast, the velocity at take-off did not correlate with body weight; both the lightest  
30 and the heaviest had the same take-off velocities (*Cacopsylla*  $1.7 \pm 0.2 \text{ m s}^{-1}$  (fastest  $2.5$   
31  $\text{m s}^{-1}$ ), *Psylla*  $1.7 \pm 0.2 \text{ m s}^{-1}$  (fastest  $2.7 \text{ m s}^{-1}$ )), with *Psyllopsis*, of intermediate weight,  
32 having the lowest take-off velocity of  $1.1 \pm 0.1 \text{ m s}^{-1}$  (fastest  $1.9 \text{ m s}^{-1}$ ) (Table 2).

33  
34 In the experimental chamber, psyllids jumped from the horizontal floor or from a vertical  
35 surface (Fig. 6A,B), but in their natural habitat they often jumped from the under surface of  
36 leaves. No matter what the starting position, the thrust and spin that was imparted by  
37 movements of the hind legs translated into two characteristic features of the jump trajectory.

38  
39 First, the angle of the trajectory was steep. Take-off elevation was controlled by the posture  
40 of the front and middle legs which set the initial position of the body in advance of the  
41 acceleration phase of the jump. In *Cacopsylla*, the take-off angle was  $80 \pm 1$  degrees and in  
42 the largest species, *Psylla* it was not significantly different at  $76 \pm 6$  degrees, but in *Psyllopsis*  
43 the angle was shallower at  $62 \pm 7$  degrees (Table 2). These figures indicate that take-off angle  
44 is not a function of body size and weight.

45  
46 Second, the rate of spin in the pitch plane was high. In *Psylla* and *Psyllopsis* the mean  
47 rotation rates in the first 80 ms after take-off were  $211 \pm 11$  Hz and  $199 \pm 17$  Hz respectively,  
48 but the smaller *Cacopsylla* had a higher rate of  $336 \pm 14$  Hz. As for take-off angles, similar  
49 rates of body spins were seen when jumping from surfaces of different orientations. Once

1 airborne, wind resistance gradually slowed the rate of rotation in all species. The wings did  
2 not immediately open upon take-off to stabilise the body against these pitch rotations. The  
3 earliest the wings were seen to open was after some 5 cycles of rotation (Fig. 6), but in many  
4 jumps the wings remained closed throughout the jump so that continuing rotation of the body  
5 resulted in landings that were not controlled. Opening of the wings was sometimes followed  
6 by flapping movements which re-oriented the body and resulted in stable forward flight.

### 7 **Controlling jump trajectory**

8 In the vast majority (209 of 211) of jumps by all three species, the head pointed downwards  
9 at take-off and the body rotated rapidly forwards in the pitch plane once airborne. Two jumps  
10 using a different strategy were performed by the same *Psyllopsis* (Fig. 7A). In these jumps,  
11 the head was raised progressively during the acceleration period so that at take-off it pointed  
12 upwards and the angle of the body relative to the horizontal was +12 degrees (Fig. 7B). By  
13 contrast, in a preceding jump by the same *Psyllopsis* the most common strategy was used so  
14 that the head pointed downwards, and the body angle at take-off was some -40 degrees (Fig.  
15 7C). At take-off, the trochanter had been rotated about the coxa by about the same amount in  
16 both jumping strategies. The difference in body orientation between the two strategies thus  
17 resulted from different movements of the femoro-tibial joints of the hind legs (Fig. 7D); in a  
18 jump with head up, the femoro-tibial joint was fully extended (180 degrees) compared to  
19 achieving an angle of only half this value in jumps with the head down. Despite the similar  
20 acceleration times, jumps with the head up had a lower take-off velocity than those with the  
21 head down (Fig. 7E) and trajectories were shallower (Fig. 7F). The direction and rate of  
22 rotation once airborne were also different. When the head pointed upwards, the body spun  
23 backwards and when downwards the body spun forwards. The pitch rate was 1,360 degrees s<sup>-1</sup>  
24 when the head pointed up compared to 22,270 degrees s<sup>-1</sup> when it pointed down.

### 25 **Synchrony of hind leg movements**

26 The two hind legs moved in parallel planes on either side of the body and their only point of  
27 contact was between the medial edges of the coxae, which did not appear to rotate about the  
28 thorax. To propel a jump, both hind legs normally started to move together or within 0.2 ms  
29 (1 frame of the video) of each other. In some jumps, however, the movements of the hind legs  
30 were less closely synchronised. Four examples of the types and times courses of asynchrony  
31 in jumping by *Psylla* are illustrated (Figs 8,9). In the first (Fig. 8A), both hind legs began in  
32 contact with the ground, but at -1.6 ms before take-off, the left hind leg began to move  
33 although the right hind leg did not. The trochanteral depression of the left, but not the right,  
34 hind leg is shown in frame -1.0 ms before take-off (Fig. 8A). This resulted in the left hind leg  
35 progressively raising the body from the ground, so that the right hind leg also lost contact  
36 with it, although it had not moved actively. Then at 0.8 ms before the jump, the right hind leg  
37 was suddenly and rapidly depressed so that its tarsus regained contact with the ground. In the  
38 last 0.2 ms before take-off, the insect was therefore propelled by both hind legs which  
39 reached the same angles of trochanteral depression and femoro-tibial extension at take-off. In  
40 the second example (Fig. 8B), the left hind leg again moved first and raised the body so that  
41 the right hind leg was lifted from the ground. This time, when the right hind leg began to  
42 move at -0.8 ms, it immediately depressed and extended almost fully and thus only the left  
43 hind leg contributed thrust during the last 0.2 ms before take-off. In the third example (Fig.  
44 8C), the left hind leg was the first to move at -1.8 ms and it then depressed the trochanter and  
45 extended the tibia fully in 0.4 ms. Only then did the right hind leg begin to depress and it  
46 movements for the next 1.4 ms alone provided the thrust for the jump. In the fourth and final  
47 example (Fig.9A,B), both hind legs started to depress at the same time, but while the left hind  
48 continued to depress and extend fully, further depression of the right hind leg was delayed for

1 0.6 ms. For the last 0.8 ms of the acceleration period, this jump was propelled by the action of  
2 a single hind leg.

3  
4 In jumps such as these with such asynchronous movements of the hind legs, there were no  
5 significant differences in the take-off angles of the body or the rate of pitch rotation  
6 compared to jumps with more synchronous movements. Moreover, there was no rotation in  
7 the yaw plane and rotation in the roll plane was not apparent. These results therefore indicate  
8 that jumping performance of *Psylla* is resilient to asynchronies of 0.4 – 1.0 ms or 24 to 59%  
9 of the acceleration period.

## 10 **Jumping performance**

11 Further features of the jumping performance were calculated from the data obtained from the  
12 high-speed images (Table 2). The average acceleration over the whole of the take-off period  
13 in an average jump was not significantly different in *Psylla* at  $1060 \text{ m s}^{-2}$  and  $910 \text{ m s}^{-2}$  in  
14 *Psyllopsis*, but was almost twice as large at  $2405 \text{ m s}^{-2}$  in the smaller *Cacopsylla*, which also  
15 had the shortest acceleration time. In their best jumps, *Psylla* and *Psyllopsis* experienced 275  
16 g and 204 g respectively, but *Cacopsylla* experienced more than twice as much at 637 g. The  
17 energy required to achieve these performances was on average 4.6  $\mu\text{J}$  in *Psylla* rising to 13.1  
18  $\mu\text{J}$  in its best jumps, and 0.8 - 1.1  $\mu\text{J}$  (2.6 -3.1  $\mu\text{J}$  in their best jumps) in the other two species.  
19 The power output in an average jump by *Psylla* was 2.7 mW rising to 13 mW in its best  
20 jumps. In *Psyllopsis* the comparable figures were 0.6 and 3.3 mW and in *Cacopsylla* 1.2 and  
21 7.8 mW. The force exerted by *Psylla* in an average jump was 3 mN rising to 9.7 mN in its  
22 best jumps; in *Psyllopsis* the comparable values were 1.1 and 3.5 mW, and in *Cacopsylla* 1.4  
23 and 6.3 mW.

24  
25 It was hard to get reliable measurements of the height and distance jumped by psyllids  
26 because their small size and tumbling motion made it difficult to distinguish jumps in which  
27 the wings were not moved from those that were eventually assisted by flapping movements of  
28 the wings.

## 30 **Discussion**

31  
32 Jumping in psyllids is propelled by rapid movements of the hind legs that are less than three  
33 quarters the length of the body and only 10-20% longer than the other legs. They are moved  
34 in parallel planes on either side of the body by large trochanteral depressor muscles located in  
35 the metathorax. Most frequently, both hind legs are moved within 0.2 ms of each other, but  
36 jumping performance is not greatly affected when there is delay of 1 ms between the two.  
37 These movements accelerate the body to take-off in 0.9 ms to 1.7 ms depending on the body  
38 weight of the particular species. In the best jumps from the horizontal, take-off velocity  
39 reached  $2.7 \text{ m s}^{-1}$  and the trajectory was steep. Once airborne the body spun rapidly forwards  
40 in the pitch plane at rates of 200 -300 Hz, depending on the species. The wings did not  
41 usually open to provide stabilisation during the early part of the trajectory, but some jumps  
42 eventually led directly to sustained flight. In their best jumps, a psyllid could experience a  
43 force of 637 g. The largest species had an energy requirement of 13  $\mu\text{J}$ , a power output of 13  
44 mW and exerted a ground reaction force of nearly 10 mN. The short acceleration time and the  
45 energy required for jumping indicate that direct muscle contractions could not generate these  
46 jumps (Askew and Marsh, 2002; Ellington, 1985; Josephson, 1993; Weis-Fogh and  
47 Alexander, 1977). Instead a catapult mechanism must be used, as in many other jumping



1 insects such as fleas (Bennet-Clark and Lucey, 1967; Sutton and Burrows, 2011), locusts  
2 (Bennet-Clark, 1975; Heitler and Burrows, 1977), froghoppers (Burrows, 2006), leafhoppers  
3 (Burrows, 2007a), and planthoppers (Burrows, 2009a).

#### 4 **Defining features of jumping**

5 The characteristic features of jumping in psyllids are that the head points downwards at take-  
6 off and that once airborne the body rotates rapidly forwards in the pitch plane. Both features  
7 indicate that the force applied by the rapid depression of the hind trochantera is not passing  
8 directly through the centre of mass of the psyllid. Moreover, the angle of the take-off  
9 trajectory was consistently much higher than the 45 degree optimum for achieving the  
10 greatest translational distance of the body in a jump. The forward rotation of the body began  
11 during the acceleration period of the jump, and resulted in the abdomen being raised from the  
12 ground but the head tilting closer towards it. This in turn meant that the weight of the body  
13 was being moved onto the front legs and that their support was an integral part of the  
14 propulsive mechanism for jumping. By contrast, insects as diverse as locusts and froghoppers  
15 may lift their front legs from the ground before the propulsion from the hind legs has been  
16 completed. In psyllids the front legs lose contact with the ground at the same time as, or even  
17 after the hind legs. They therefore play a key role in supporting the body while thrust is  
18 applied by the hind legs. The posture adopted by psyllids as they are about to jump is  
19 strikingly similar to that of a human performing a hand stand. A head down posture is also  
20 adopted by psyllids when feeding naturally with their piercing mouthparts, which emerge  
21 ventrally between the front and middle legs (see Fig. 2A), pressed against its host plant and  
22 into its phloem. From this posture, the common head down, jumping strategy would provide  
23 the most rapid escape.

24  
25 The initial rate of rotation once airborne is remarkable, ranging from 200 Hz in the larger  
26 species to more than 300 Hz in the smallest species. The rotation was limited to the pitch  
27 plane and results from application of force by the hind legs behind the centre of mass. The  
28 only insects known to exceed these rotation rates during a jump are springtails which propel  
29 themselves by extending the forked furca at the end of their abdomen, and thus well behind  
30 their centre of mass, with resulting spin rates of 480 Hz (Christian, 1979). In pygmy mole  
31 crickets the spin rate is above 100 Hz, but in these insects the pitch rotation is backwards  
32 (Burrows and Picker, 2010), and in flea beetles the forward spin rates range from 21 - 187 Hz  
33 in different species (Brackenbury and Wang, 1995). In froghoppers and leafhoppers, the spin  
34 rates are much lower and do not exceed 10 Hz (Brackenbury, 1996). Spinning at high rates  
35 will consume much energy that could otherwise have contributed to the forward momentum,  
36 and hence displacement of the body. Wings were not opened or flapped in the initial stages of  
37 any jumps and could not therefore contribute to stabilisation. Some jumps do, however, lead  
38 directly to stable flight later in a trajectory.

39  
40 What evolutionary advantage could spinning add to jumping, or is it just a consequence of  
41 body shape? In springtails, which use an appendage at the rear end of the body in jumping,  
42 there seems little scope in adjusting the point of force application relative to the centre of the  
43 body mass. With the use of hind legs that move at the side of the body, as in psyllids, scope  
44 for adjustment is limited by the length of the metathoracic segment relative to the centre of  
45 mass. A mechanism for varying the spin rate is, however, available to psyllids but it appears  
46 to be used rarely. In only 2 of 211 jumps analysed, the movements of the femoro-tibial joints  
47 were more extensive and resulted in the head pointing upwards at take-off and the resulting  
48 spin rate was greatly reduced. The mechanics of how this is achieved await determining the  
49 natural circumstances under which psyllids will more readily use this jumping strategy.

1  
2 Given that psyllids can generate jumps with little spin, why do they so frequently jump in a  
3 way that generates high spin rates? First, spinning will add to the unpredictability of the  
4 trajectory of a jump and the subsequent landing. A predator seeking to catch an airborne  
5 psyllid will find it harder to predict its position from its starting position. Second, if the spin  
6 rate can be varied, then predators will not be able to predict accurately the landing site. Such  
7 advantages as these must outweigh those where all the energy is put into achieving the  
8 highest velocity of a jump, and argue in favour of psyllid jumping being a mechanism of  
9 escape from predators rather than a fast way of moving from one place to another. Potential  
10 predators are numerous and include lacewings, wasps and ladybirds. If detected in time, a  
11 rapid jump should displace psyllids from the grasp of such predators.

## 12 **Jumping performance**

13 The jumping performance of psyllids places them firmly amongst the most accomplished of  
14 jumping insects. The acceleration time of a jump is much shorter than that of larger locusts  
15 (Bennet-Clark, 1975), and is similar to froghoppers (Burrows, 2006), planthoppers (Burrows,  
16 2009a) and fleas (Sutton and Burrows, 2011). Their take-off velocities, however, fall well  
17 short of those of the first two groups, but match that of leafhoppers (Burrows, 2007a), and  
18 exceed that of fleas (Sutton and Burrows, 2011). It has not been possible to compare jumping  
19 distances because spinning psyllids are hard to distinguish from ones flapping their wings.  
20 All of the insects mentioned here use catapult mechanisms. This implies that the power-  
21 producing muscles must contract slowly before a jump, energy must then be stored in  
22 structures within the body and then released suddenly. The energy storage mechanisms are  
23 only known for a few insects and they are varied: flea beetles are suggested to use a spring in  
24 the hind femur (Furth, 1988; Furth et al., 1983): locusts use several sites including active  
25 bending of semi-lunar springs in the femur (Bennet-Clark, 1975; Burrows and Morris, 2001;  
26 Cofer et al., 2010): froghoppers and planthoppers actively bend the metathoracic pleural  
27 arches by prolonged contractions of trochanteral depressor muscles and then unfurl them  
28 before a jump (Burrows, 2010; Burrows et al., 2008). These arches are made of a composite  
29 of the soft, elastic protein resilin and hard cuticle (Burrows et al., 2008). The next task in  
30 psyllids must be to identify the structures that store the energy generated by the trochanteral  
31 depressor muscles and to analyse whether they are made of a composite of resilin and hard  
32 cuticle.

## 33 **Acknowledgements**

34 I thank my Cambridge colleagues Greg Sutton and Steve Rogers for their help in collecting  
35 these bugs, for their many helpful suggestions during the course of this work, and for their  
36 comments on the manuscript. Jo Riley and Marina Dorosenko provided invaluable help in the  
37 collection and preparation of the data. I am also very grateful to Meta Virant and Peter  
38 Bräunig for their help and hospitality during my stays in their laboratories in Ljubljana and  
39 Aachen respectively.

## 41 **Funding**

42 This research received no specific grant from any funding agency in the public, commercial,  
43 or not-for-profit sectors.

44  
45  
46

## Figure Legends

1

### 2 **Fig. 1**

3 Photographs of *Psylla alni*. A. Side view. B. Ventral view. Scale bar 0.5 mm.

### 4 **Fig. 2**

5 Drawings of *Psylloopsis fraxini*. A. View of the right side with the right hind leg fully levated  
6 and ready to propel a jump. The femur locates in a hollowed and membranous area of the side  
7 wall of the metathorax bounded anteriorly by the trochantin. B. The same view with the right  
8 hind leg fully depressed, as it would be at the end of a jump. The large coxa of the right hind  
9 leg is now visible. The tibiae and tarsi of the front and middle legs are omitted. C. Ventral  
10 view with the hind legs fully depressed and pointing forwards. D. The left half of the  
11 metathorax viewed from inside, to show the large trochanteral depressor muscle of a hind leg  
12 and its tendon.

### 13 **Fig. 3**

14 Scanning electron micrographs of the right hind leg of *Psylla alni*. A. Ventral view of the  
15 right trochanter and femur which lies in a groove in the side wall of the thorax bounded  
16 anteriorly by the trochantin. A pointed meracanthus projects posteriorly from the coxa. The  
17 inset shows the dorsal surface of the femur touching the edge of a hair field on the coxa. B.  
18 Ventral view of the right hind trochanter which is fully depressed so that the hind leg points  
19 anteriorly and reveals the articulation of the trochanter with the coxa. The insertion of the  
20 tendon of the large trochanteral depressor muscle is visible. C. Lateral view of the right hind  
21 leg of *Psylla alni*. The hind leg is depressed fully so that it projects forwards to reveal the  
22 articulation between the right trochanter and the coxa and the groove between the coxa and  
23 trochantin. Two hair fields are visible; the larger with more densely packed sensilla on the  
24 coxa, and a smaller one on the trochantin.

### 25 **Fig. 4**

26 Images of a jump by *Psylla alni* viewed from the side and captured at  $5000\text{ s}^{-1}$ , each with an  
27 exposure time of 0.05 ms. The images are arranged in two columns, with the bottom left-hand  
28 corner of each image providing a constant reference point in this and in Figs 5, 7-9. The hind  
29 legs started to move at -2.4 ms and the continuing depression of the hind trochantera raised  
30 the rear of the body so that the middle legs lost contact with the ground and the head pitched  
31 forwards. Once airborne, the body rotated rapidly in the pitch plane. The cartoons show how  
32 the angle of the body relative to the ground was measured when the head was pointing  
33 upwards (frame -2.4ms) and then downwards (frame 0 ms).

### 34 **Fig. 5**

35 Images of three jumps by the same *Cacopsylla peregrina* viewed from different orientations  
36 to show the sequence of movements of the hind legs. Images were captured at  $5000\text{ s}^{-1}$ , each  
37 with an exposure time of 0.05 ms. A. Jump viewed from the side. B. Jump toward and to the  
38 right of the camera. C. Jump from the front, glass wall of the chamber and viewed from  
39 underneath.

### 40 **Fig. 6**

41 Body rotations in the pitch plane after take-off from jumps by *Psylla alni* plotted as vertical  
42 displacement against horizontal displacement; the open symbols show the position of the  
43 front of the head every 0.4 ms and the black symbols give a time scale of every 2 ms. The

1 cartoons show the orientation of the body at the points indicated and the curved arrows with  
2 white heads indicate the direction of rotation. A. Four jumps in which three *Psylla* jumped  
3 from a vertical wall (vertical, gray bar) in the chamber. In all jumps the body rotated and in  
4 two jumps the wings were opened at the points indicated by the black arrows and began to  
5 flap. B. Four jumps, all by the same *Psylla*, from the floor of the chamber (horizontal, gray  
6 bar). In one jump, the wings were opened (black arrow) and began to flap.

### 7 **Fig. 7**

8 Two distinct jumping strategies used sequentially by the same *Psyllopsis fraxini*. A. Jump  
9 powered by movements of the coxo-trochanteral joints of the hind legs in which the head  
10 pointed downwards at take-off (open symbols in graphs C-F). B. Jump powered by  
11 movements of the femoro-tibial joints in which the head pointed upwards at take-off (closed  
12 symbols in graphs C-F). C. Graph of body angle relative to ground in a jump. In the  
13 commonly used strategy (A) the head pointed downwards at take-off and the body angles  
14 were negative; in a rarely used strategy (B) the head pointed upwards at take-off and the body  
15 angles were positive. D. Graphs of the changes in the femoro-tibial and thoraco-femoral  
16 angles. The inset frames show the different positions of the hind leg joints at take-off in the  
17 two jumping strategies. E. Take-off velocities in both jumping strategies. F. The trajectory of  
18 the take-off was steeper using the strategy in A compared with the strategy in B.

### 19 **Fig. 8**

20 Asynchrony of hind leg movements during jumping. Selected frames from three jumps by  
21 *Psylla alni* are arranged in columns A-C. A diagram on each frame shows the angles of the  
22 trochanter relative to the body, the femoro-tibial angle and the tibio-tarsal angle for each hind  
23 leg (right in black, left in magenta). The pink line indicates the angle of the body relative to  
24 the horizontal. The movements of the left hind leg, which are partially obscured by the body  
25 in the initial frames in this and the next figure, were determined from the position of the hind  
26 tarsus, the length of the hind tibia which was visible, and from knowledge of the position of  
27 the trochantero-coxal joint visible in later frames. In A, B, the ground is indicated by the  
28 horizontal white bar; in C take-off was from the front wall of the glass chamber.

### 29 **Fig. 9**

30 Jump by *Psylla alni* powered predominantly by one hind leg. A. Selected frames from the  
31 jump with diagrams (as in Fig. 8) showing the progressive changes in the joint angles of the  
32 two hind legs (right filled symbols, left open symbols) and the orientation of the body (pink  
33 triangles). B. Graphs of the changes in joint angles (as indicated in the cartoons on the right)  
34 of the right and left hind leg.

35

36

37

## Supplementary Material

### 38 **Movie 1**

39 A jump by *Psylla alni* captured at 5000 frames s<sup>-1</sup> and replayed at 30 frames s<sup>-1</sup>. The insect is  
40 viewed from the side as it jumps and is then propelled through the air spinning forwards in  
41 the pitch plane. After two complete cycles of rotation the wings are opened and then begin to  
42 flap.

1 **Movie 2**

2 A close-up view from the side of a jump by *Psylla alni* captured at 5000 frames s<sup>-1</sup> and  
3 replayed at 10 frames s<sup>-1</sup>. The rapid extension of the hind legs lifts the abdomen and lowers  
4 the head so that the front legs are the last to lose contact with the ground at take-off.  
5

## References

- Askew, G. N. and Marsh, R. L.** (2002). Muscle designed for maximum short-term power output: quail flight muscle. *J. Exp. Biol.* **205**, 2153-60.
- Bennet-Clark, H. C.** (1975). The energetics of the jump of the locust *Schistocerca gregaria*. *J. Exp. Biol.* **63**, 53-83.
- Bennet-Clark, H. C. and Lucey, E. C. A.** (1967). The jump of the flea: a study of the energetics and a model of the mechanism. *J. Exp. Biol.* **47**, 59-76.
- Brackenbury, J.** (1996). Targetting and visuomotor space in the leaf-hopper *Empoasca vitis* (Gothé) (Hemiptera: Cicadellidae). *J. Exp. Biol.* **199**, 731-40.
- Brackenbury, J. and Wang, R.** (1995). Ballistics and visual targeting in flea-beetles (Alticinae). *J. Exp. Biol.* **198**, 1931-1942.
- Burrows, M.** (2003). Froghopper insects leap to new heights. *Nature* **424**, 509.
- Burrows, M.** (2006). Jumping performance of froghopper insects. *J. Exp. Biol.* **209**, 4607-4621.
- Burrows, M.** (2007a). Kinematics of jumping in leafhopper insects (Hemiptera, Auchenorrhyncha, Cicadellidae). *J. Exp. Biol.* **210**, 3579-3589.
- Burrows, M.** (2007b). Neural control and co-ordination of jumping in froghopper insects. *J. Neurophysiol.* **97**, 320-330.
- Burrows, M.** (2009a). Jumping performance of planthoppers (Hemiptera, Issidae). *J. Exp. Biol.* **212**, 2844-2855.
- Burrows, M.** (2009b). Jumping strategies and performance in shore bugs (Hemiptera, Heteroptera, Saldidae). *J. Exp. Biol.* **212**, 106-115.
- Burrows, M.** (2010). Energy storage and synchronisation of hind leg movements during jumping in planthopper insects (Hemiptera, Issidae). *J. Exp. Biol.* **213**, 469-478.
- Burrows, M., Hartung, V. and Hoch, H.** (2007). Jumping behaviour in a Gondwanan relict insect (Hemiptera: Coleorrhyncha: Peloridiidae). *J. Exp. Biol.* **210**, 3311-8.
- Burrows, M. and Morris, G.** (2001). The kinematics and neural control of high speed kicking movements in the locust. *J. Exp. Biol.* **204**, 3471-3481.
- Burrows, M. and Picker, M. D.** (2010). Jumping mechanisms and performance of pygmy mole crickets (Orthoptera, Tridactylidae). *J. Exp. Biol.* **213**, 2386-2398.
- Burrows, M., Shaw, S. R. and Sutton, G. P.** (2008). Resilin and cuticle form a composite structure for energy storage in jumping by froghopper insects. *BMC Biol.* **6**, 41.
- Christian, E.** (1979). The jump of the Collembola. *Zool. Jb. Physiol.* **83**, 457-490.
- Cofer, D., Cymbalyuk, G., Heitler, W. J. and Edwards, D. H.** (2010). Neuromechanical simulation of the locust jump. *J. Exp. Biol.* **213**, 1060-1068.
- Crawford, D. L.** (1914). A monograph of the jumping plant-lice or Psyllidae of the New World. *Bull. US natn. Mus.* **85**, 1-182.
- Ellington, C. P.** (1985). Power and efficiency of insect flight muscle. *J. Exp. Biol.* **115**, 293-304.
- Furth, D. G.** (1988). The jumping apparatus of flea beetles (Alticinae) - the metafemoral spring. In *The biology of Chrysomelidae*, eds. P. Jolivet E. Petitpierre and T. H. Hsiao): Kluwer Academic.
- Furth, D. G., Traub, W. and Harpaz, I.** (1983). What makes *Blepharida* jump? A structural study of the metafemoral spring of a flea beetle. *J. Exp. Zool.* **227**, 43-47.
- Heitler, W. J. and Burrows, M.** (1977). The locust jump. I. The motor programme. *J. Exp. Biol.* **66**, 203-219.

- Josephson, R. K.** (1993). Contraction dynamics and power output of skeletal muscle. *Annu. Rev. Physiol.* **55**, 527-46.
- Sutton, G. P. and Burrows, M.** (2011). Biomechanics of jumping in the flea. *J. Exp. Biol.* **214**, 836-847.
- Weber, H.** (1929). Kopf und Thorax von *Psylla mali* Schmidb (Hemiptera - Homoptera.) Eine Morphogenetische Studie. *Z. morph. Okol. Tiere* **14**, 59-165.
- Weis-Fogh, T. and Alexander, R. M.** (1977). The sustained power output from striated muscle. In *Scale effects in animal locomotion*, (ed. T. J. Pedley), pp. 511-525. London: Academic Press.

**Table 1. Body form in Psyllids**

| Insect                                            | Body length, mm   | Body weight, mg    | Hind leg Tibia, mm | Hind leg Femur, mm | Ratio of leg lengths |        |      | Hind leg length as % of body length | Hind leg length (mm)/ body weight <sup>1/3</sup> (mg) |
|---------------------------------------------------|-------------------|--------------------|--------------------|--------------------|----------------------|--------|------|-------------------------------------|-------------------------------------------------------|
|                                                   |                   |                    |                    |                    | Front                | Middle | Hind |                                     |                                                       |
| <i>Cacopsylla peregrina</i><br>(Hawthorn psyllid) | 1.9±0.1<br>(N=13) | 0.7±0.03<br>(N=35) | 0.5±0.02<br>(N=13) | 0.5±0.02<br>(N=13) | 1                    | 1      | 1.1  | 66                                  | 1.5                                                   |
| <i>Psyllopsis fraxini</i> (Ash psyllid)           | 2.2±0.1<br>(N=7)  | 1.2±0.1<br>(N=19)  | 0.9±0.02<br>(N=7)  | 0.6±0.01<br>(N=7)  | 1                    | 1      | 1.2  | 76                                  | 1.6                                                   |
| <i>Psylla alni</i><br>(Alder psyllid)             | 4.0±0.3<br>(N=7)  | 2.8±0.1<br>(N=29)  | 1.0±0.1<br>(N=7)   | 0.8±0.02<br>(N=7)  | 1                    | 1      | 1.2  | 61                                  | 1.7                                                   |

Body length and weight, and lengths of the hind femora and tibiae in three species of psyllids; N indicates the number of individuals from which the measurements were taken. The ratio of leg lengths is given relative to the front legs.



**Table 2. Jumping Performance of Psyllids**

|                                    | Body weight (m)    | Time to take off (t) | Take-off velocity (v) | Take-off angle | Body angle at take-off | Acceleration (f) | g force      | Energy (e)             | Power (p)         | Force             | Rotation |
|------------------------------------|--------------------|----------------------|-----------------------|----------------|------------------------|------------------|--------------|------------------------|-------------------|-------------------|----------|
| <b>Formula</b>                     |                    |                      |                       |                |                        | $f = v/t$        | $g = f/9.86$ | $e = 0.5 * m.v^2$      | $= e/t$           | $= m f$           |          |
| <b>Units</b>                       | mg ( $10^{-6}$ kg) | ms ( $10^{-3}$ s)    | $m s^{-1}$            | degrees        | degrees                | $m s^{-2}$       | g            | $\mu J$ ( $10^{-6}$ J) | mW ( $10^{-3}$ W) | mN ( $10^{-3}$ N) | Hz       |
| <b><i>Cacopsylla peregrina</i></b> |                    |                      |                       |                |                        |                  |              |                        |                   |                   |          |
| <b>average</b>                     | 0.7±0.1            | 0.9±0.3              | 1.7±0.2               | 80±1           | -61±5                  | 1910             | 195          | 1.1                    | 1.2               | 1.4               | 336±14   |
| <b>best</b>                        | 1                  | 0.4                  | 2.5                   |                |                        | 6250             | 637          | 3.1                    | 7.8               | 6.3               |          |
| <b><i>Psyllopsis fraxini</i></b>   |                    |                      |                       |                |                        |                  |              |                        |                   |                   |          |
| <b>average</b>                     | 1.2±0.1            | 1.2±0.2              | 1.1±0.1               | 62±7           | -58±3                  | 910              | 93           | 0.8                    | 0.6               | 1.1               | 199±17   |
| <b>best</b>                        | 1.5                | 0.8                  | 1.9                   |                |                        | 2340             | 240          | 2.6                    | 3.3               | 3.5               |          |
| <b><i>Psylla alni</i></b>          |                    |                      |                       |                |                        |                  |              |                        |                   |                   |          |
| <b>average</b>                     | 2.8±0.1            | 1.7±0.2              | 1.7±0.2               | 76±6           | -66±3                  | 1060             | 108          | 4.6                    | 2.7               | 3.0               | 221±11   |
| <b>best</b>                        | 3.6                | 1.0                  | 2.7                   |                |                        | 2700             | 275          | 13.1                   | 13.0              | 9.7               |          |

The jumping performance of three species of psyllids. The data are the mean of means for the performance of individuals; 40 jumps by 8 *Cacopsylla*, 19 jumps by 5 *Psyllopsis* and 32 jumps by 7 *Psylla*, with a minimum of 3 jumps by each psyllid. The best performance of a particular individual for each species is also given.

Figure 1

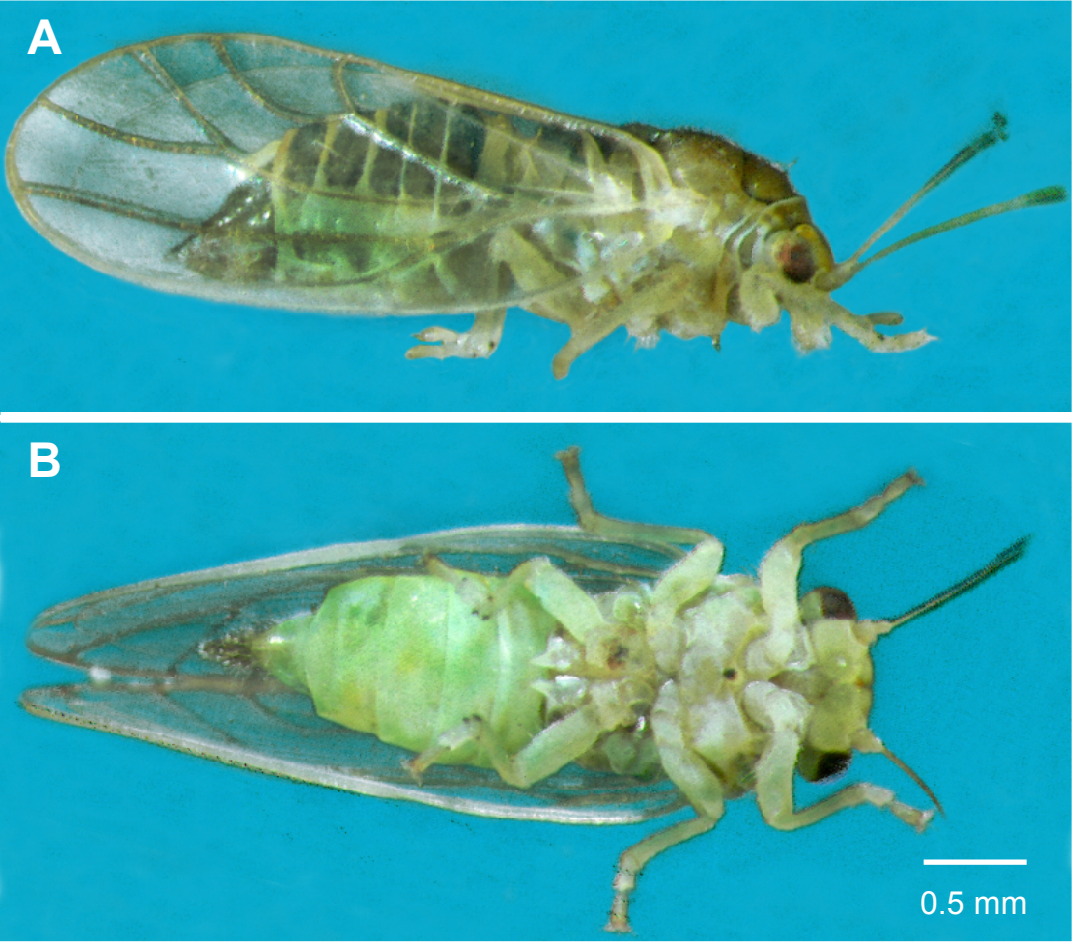

**Figure 2**

**A**

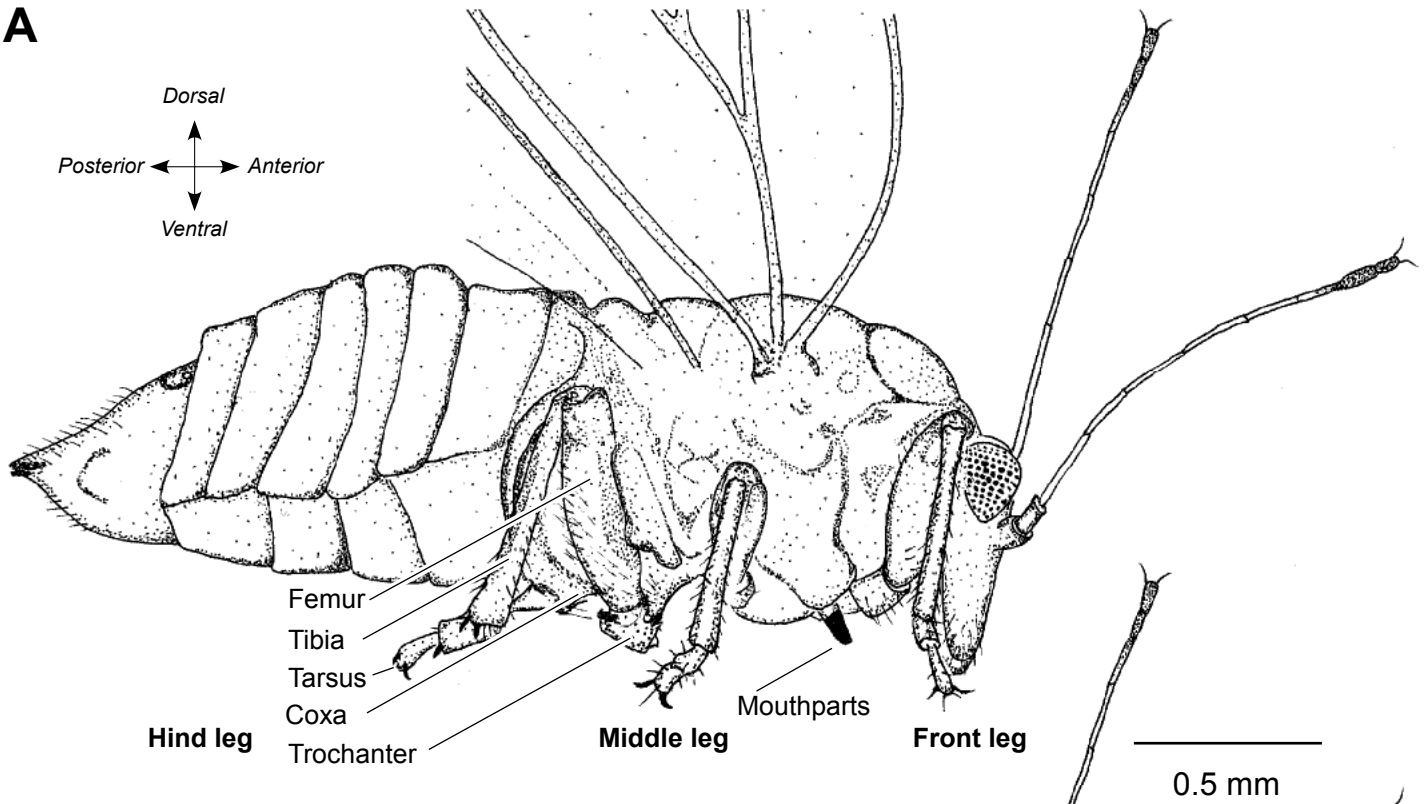

**B**

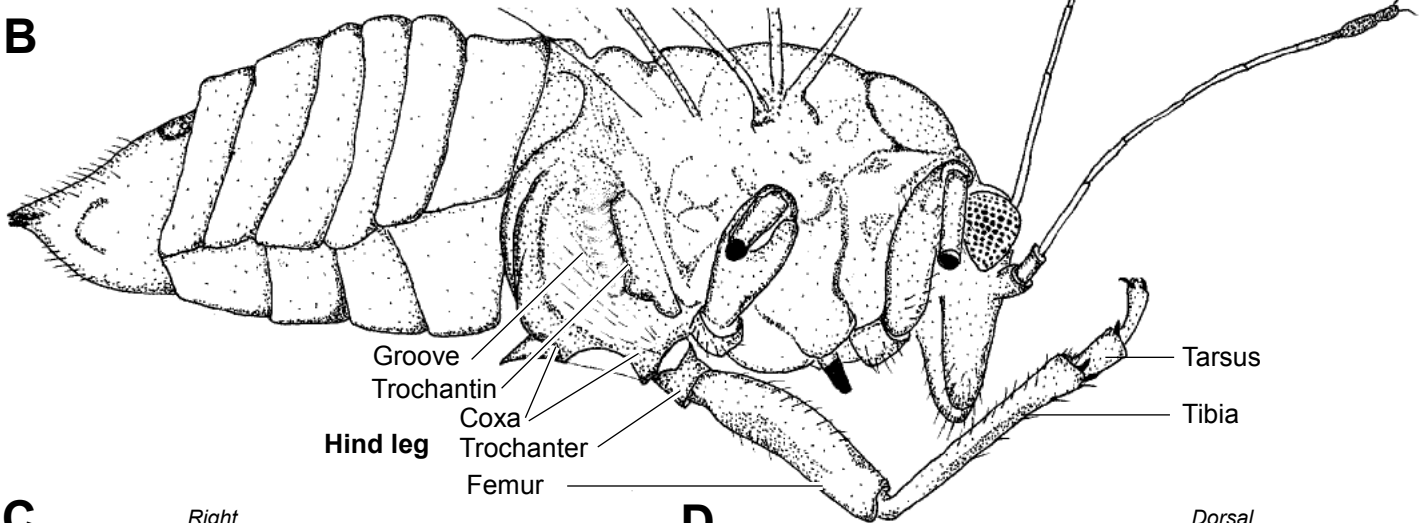

**C**

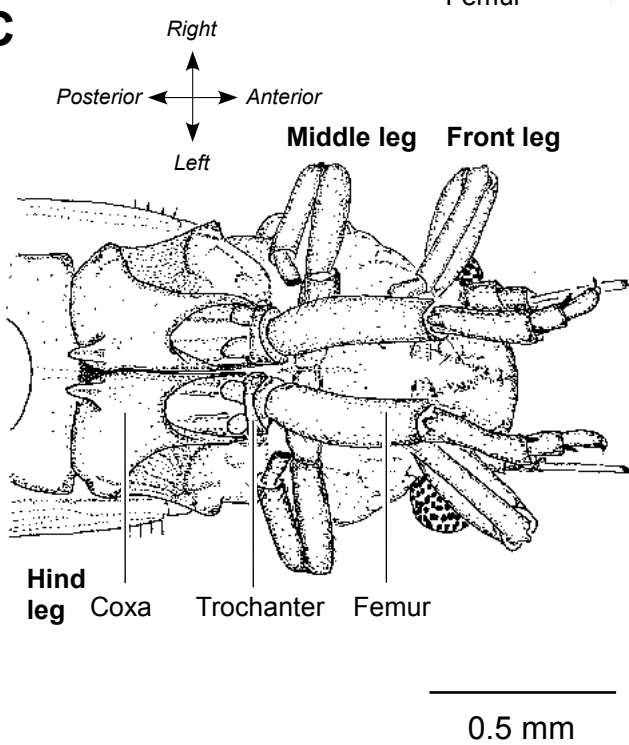

**D**

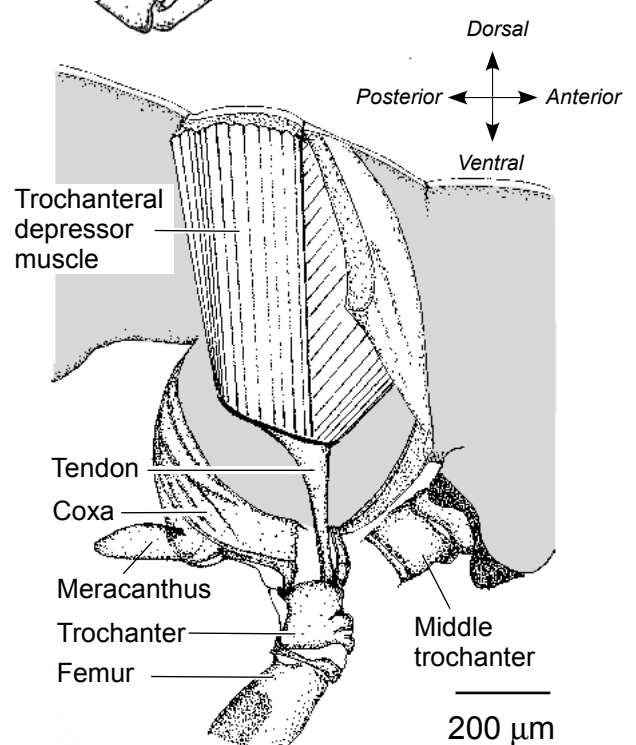

**Figure 3**

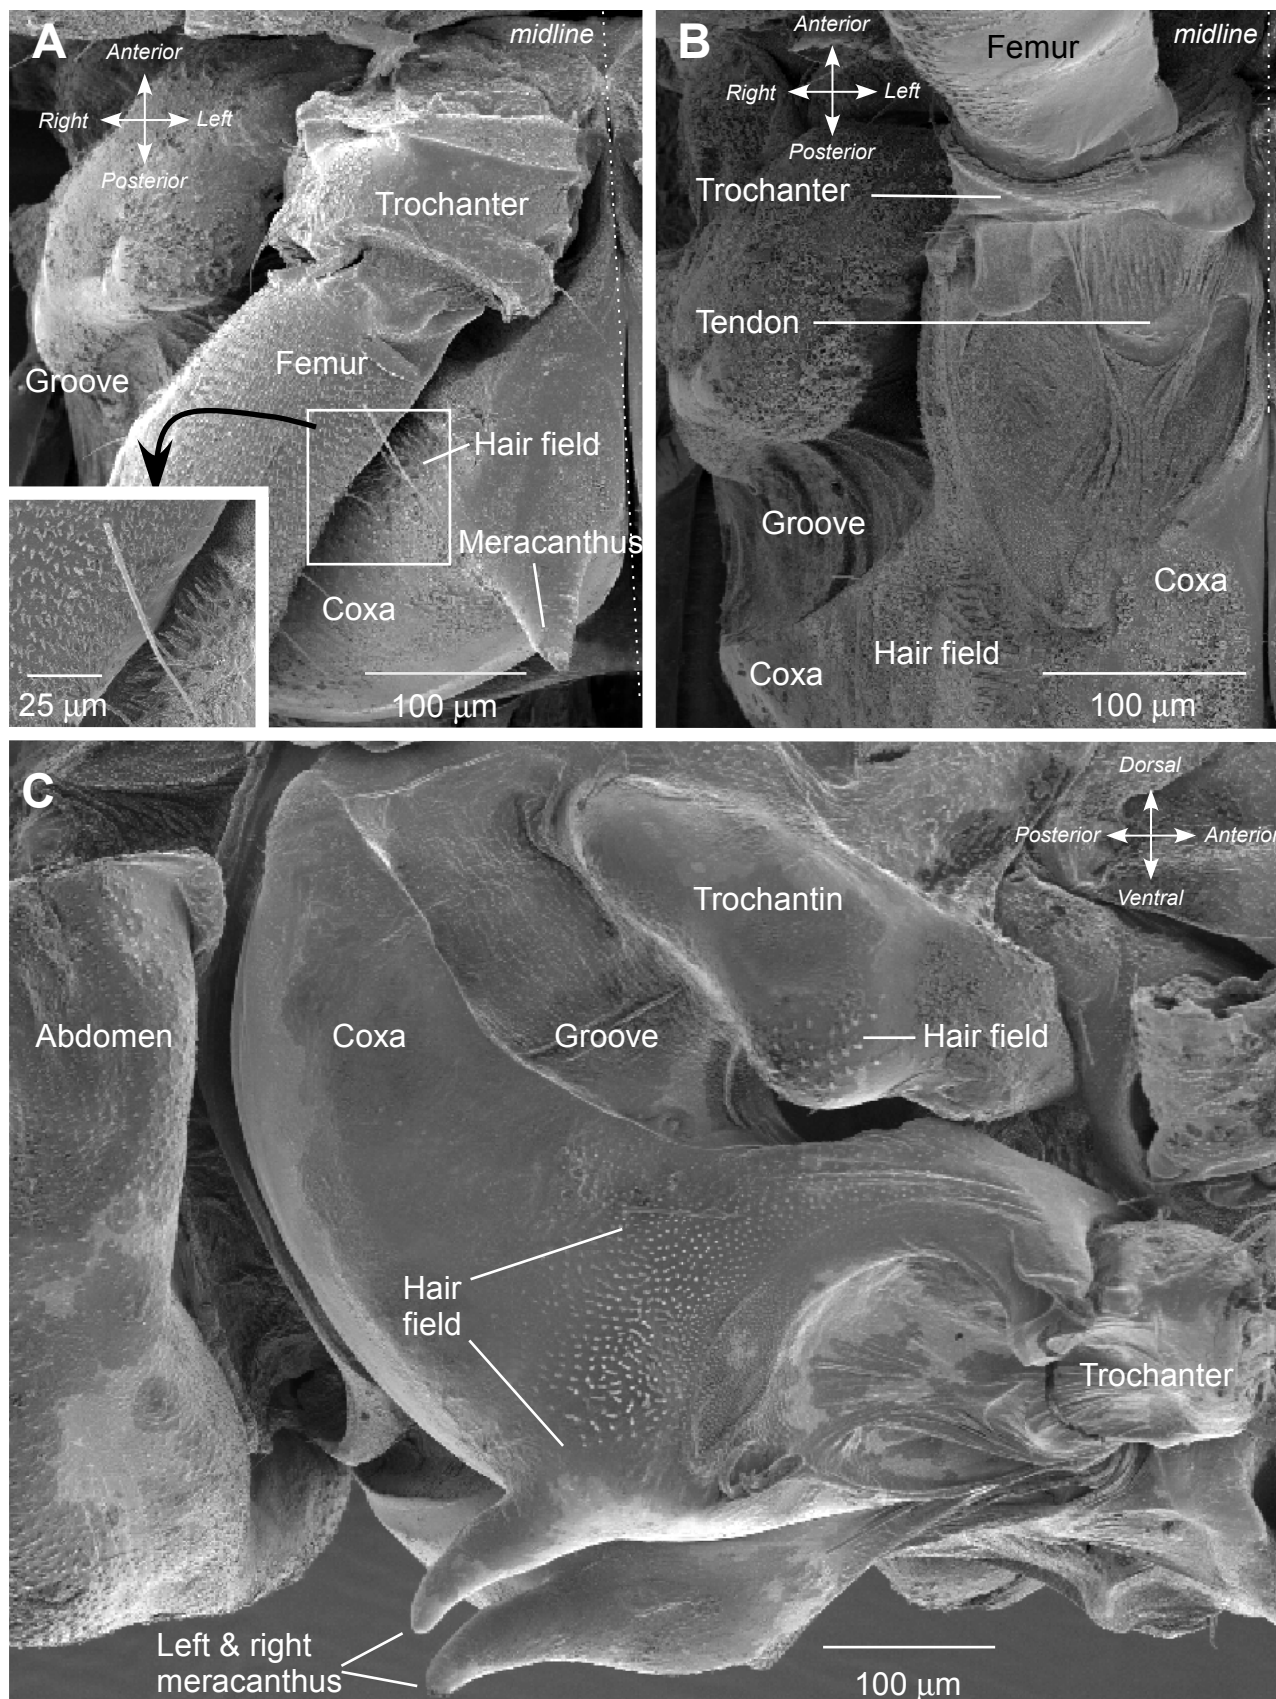

**Figure 4**

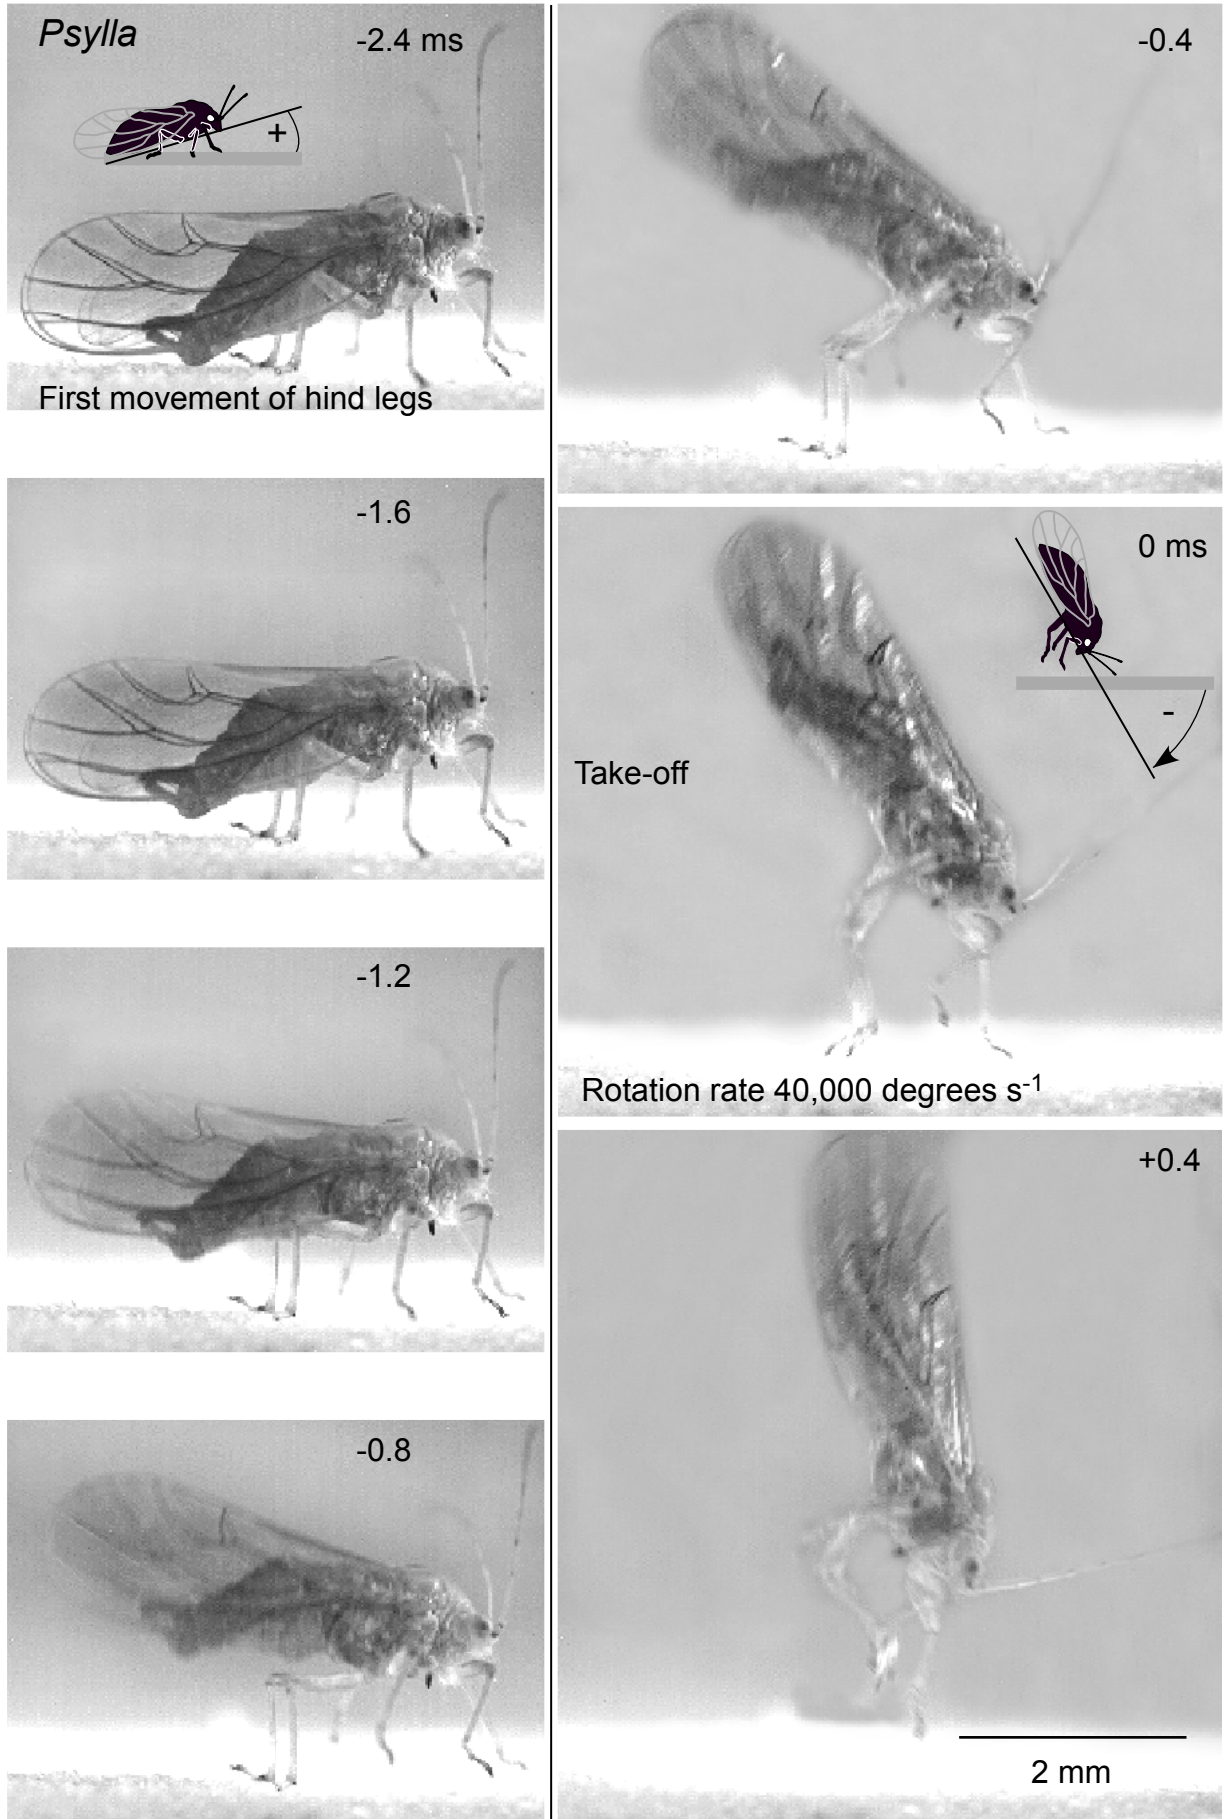

**Figure 5**

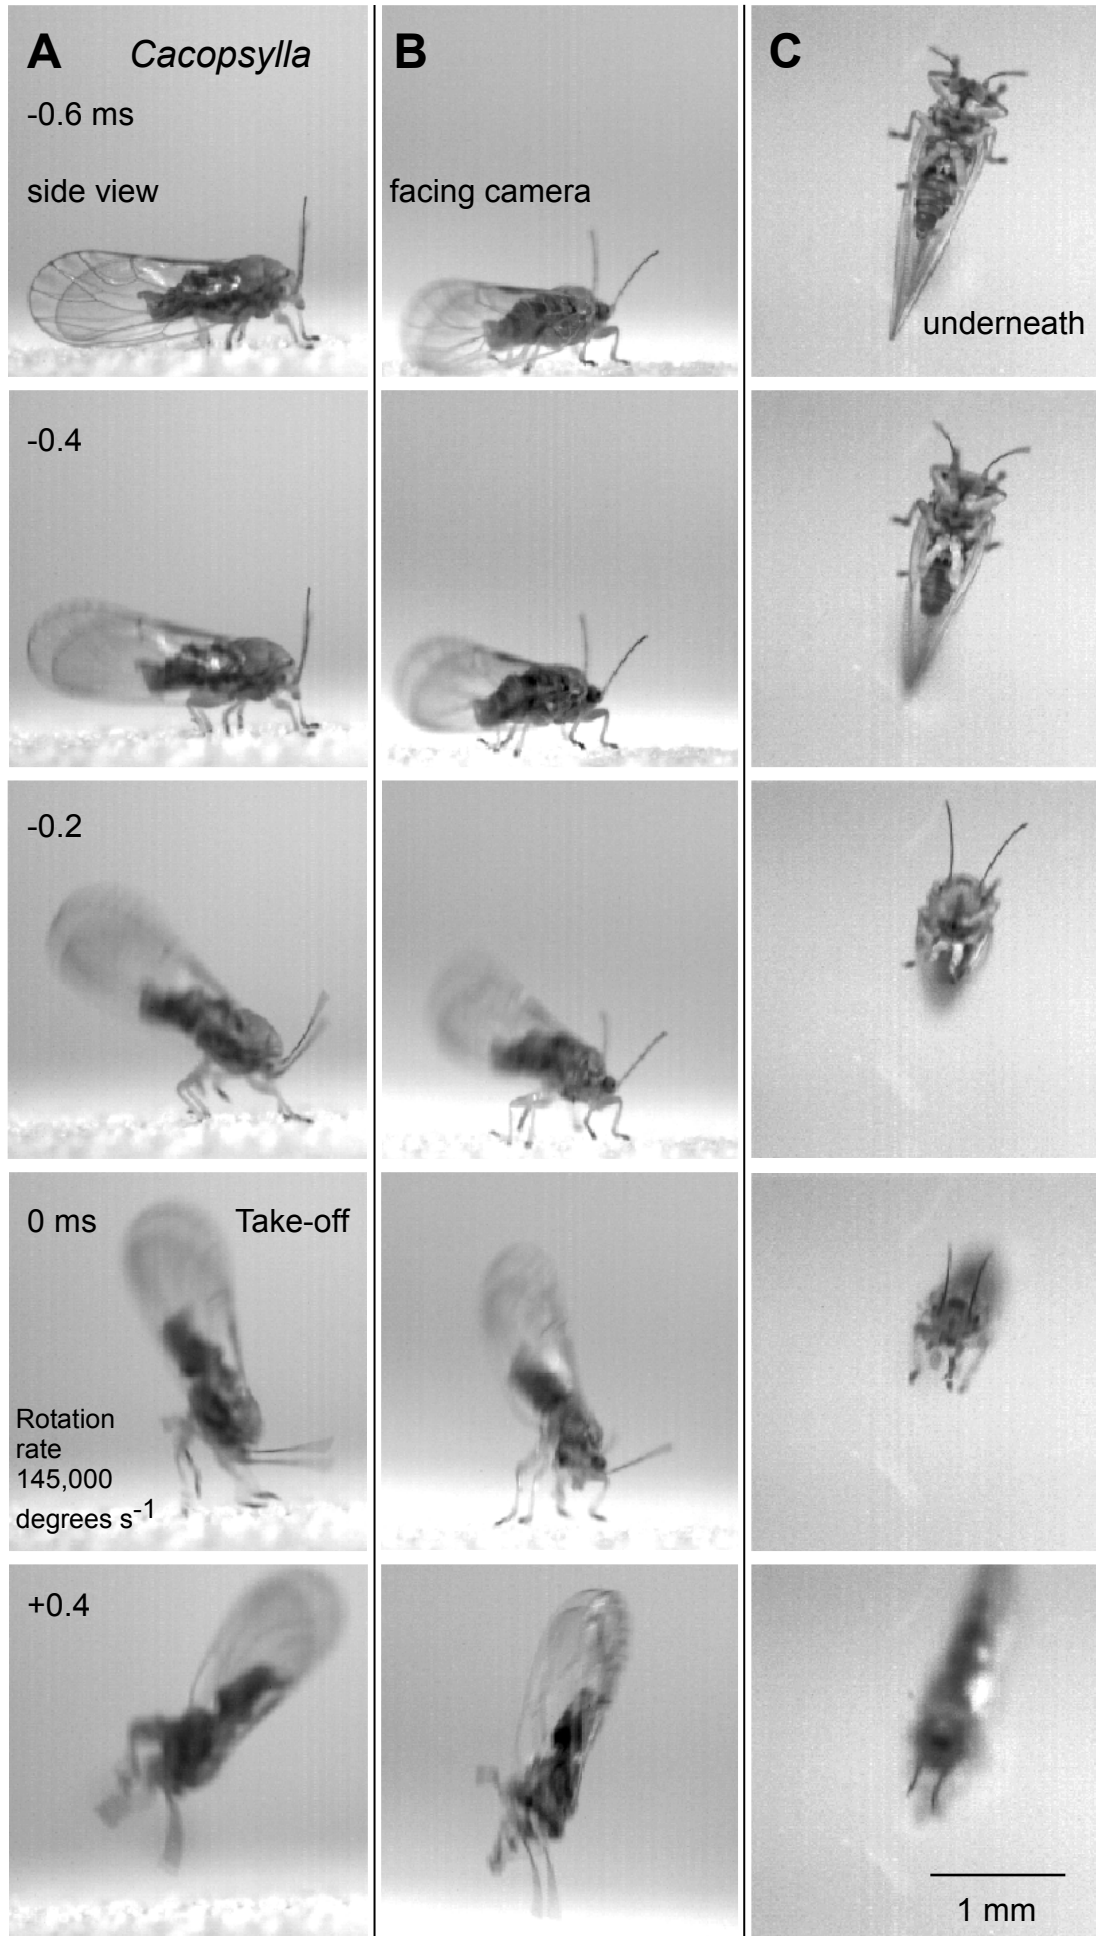

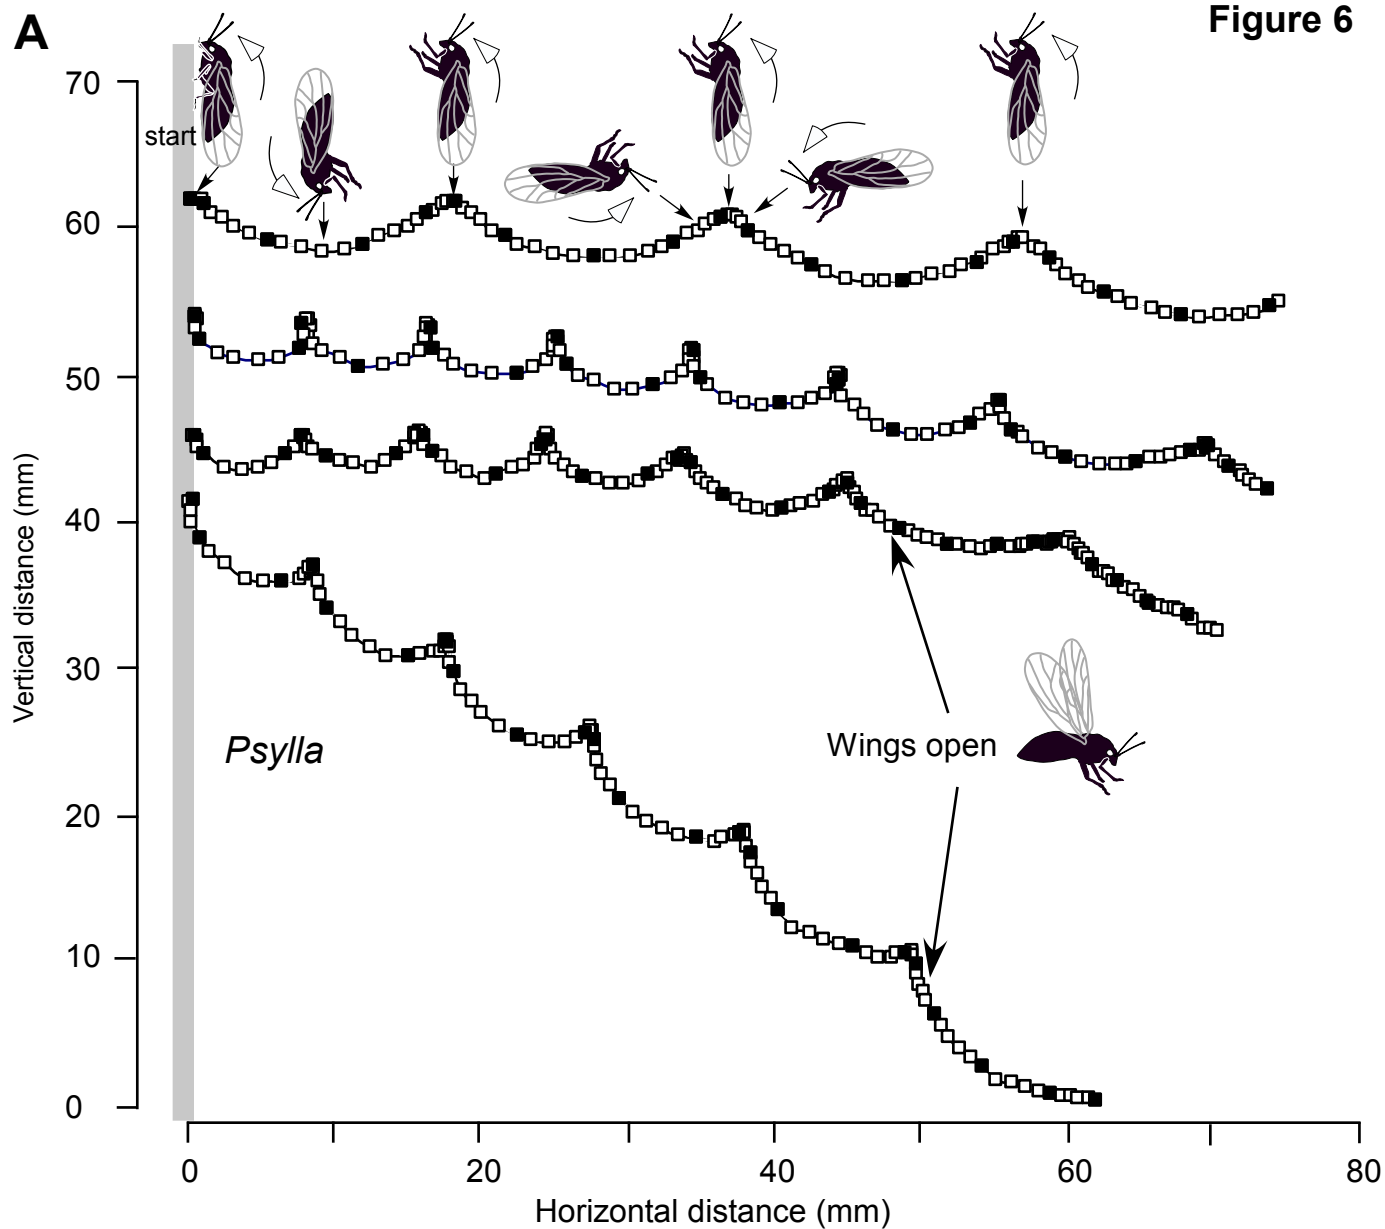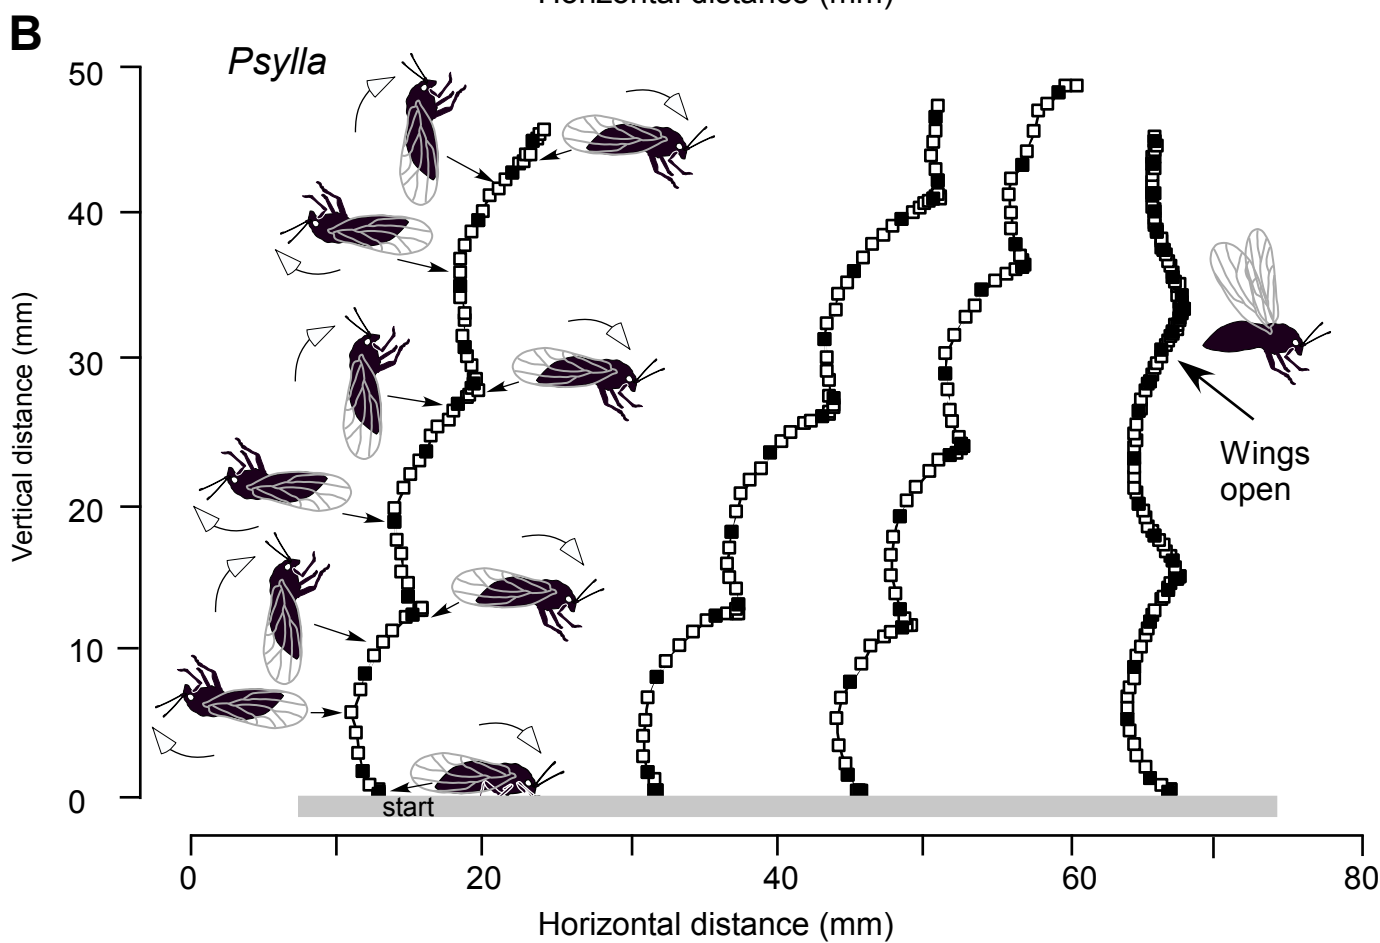

**Figure 7**

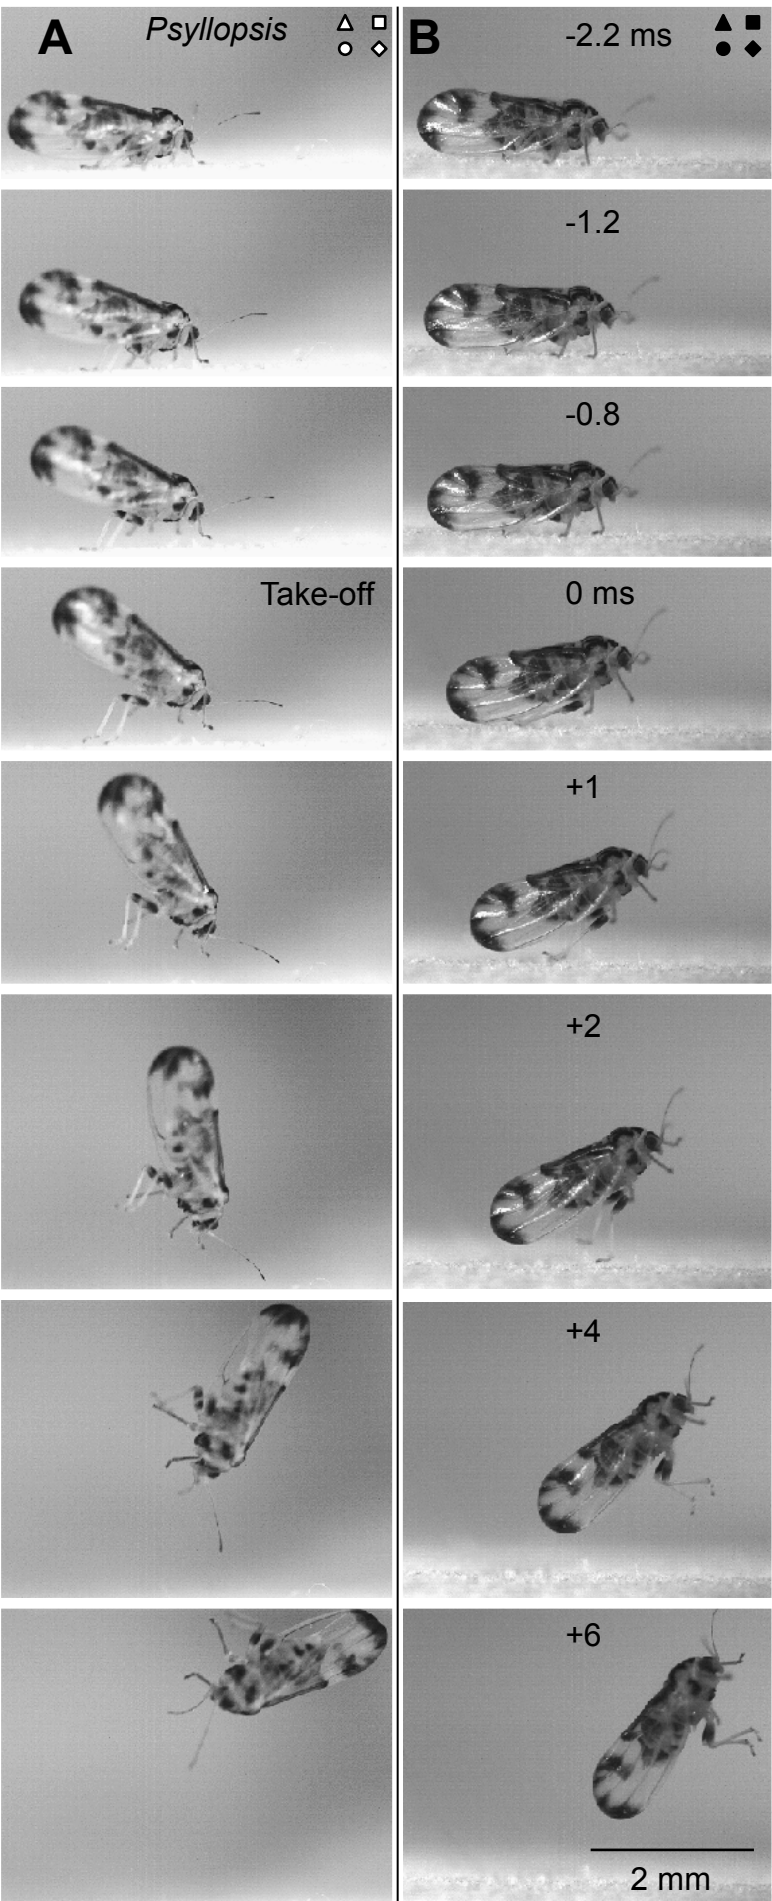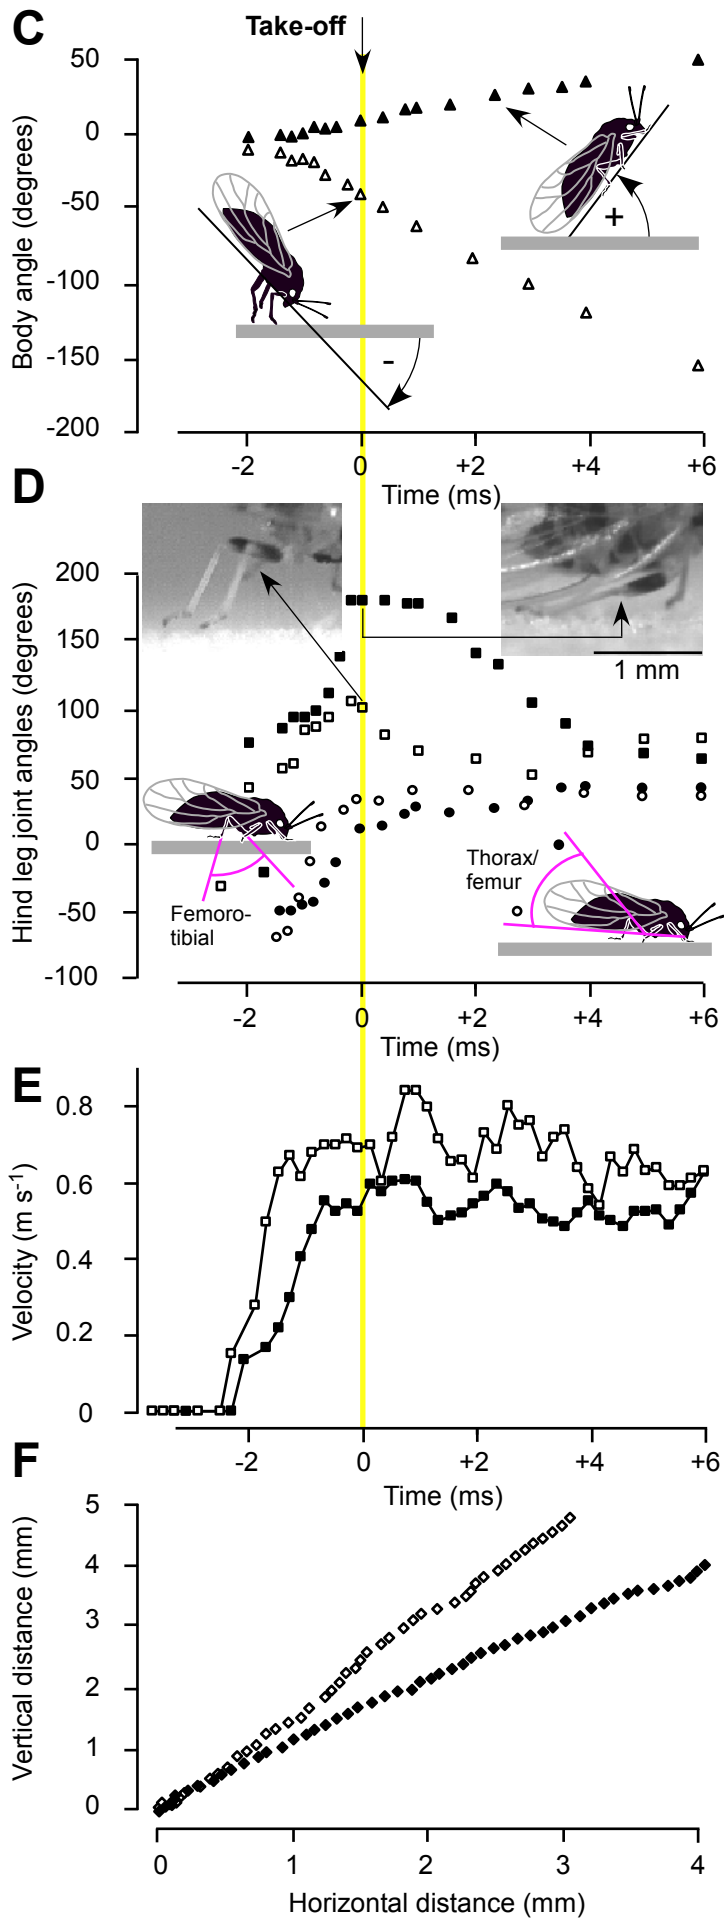



**Figure 8**

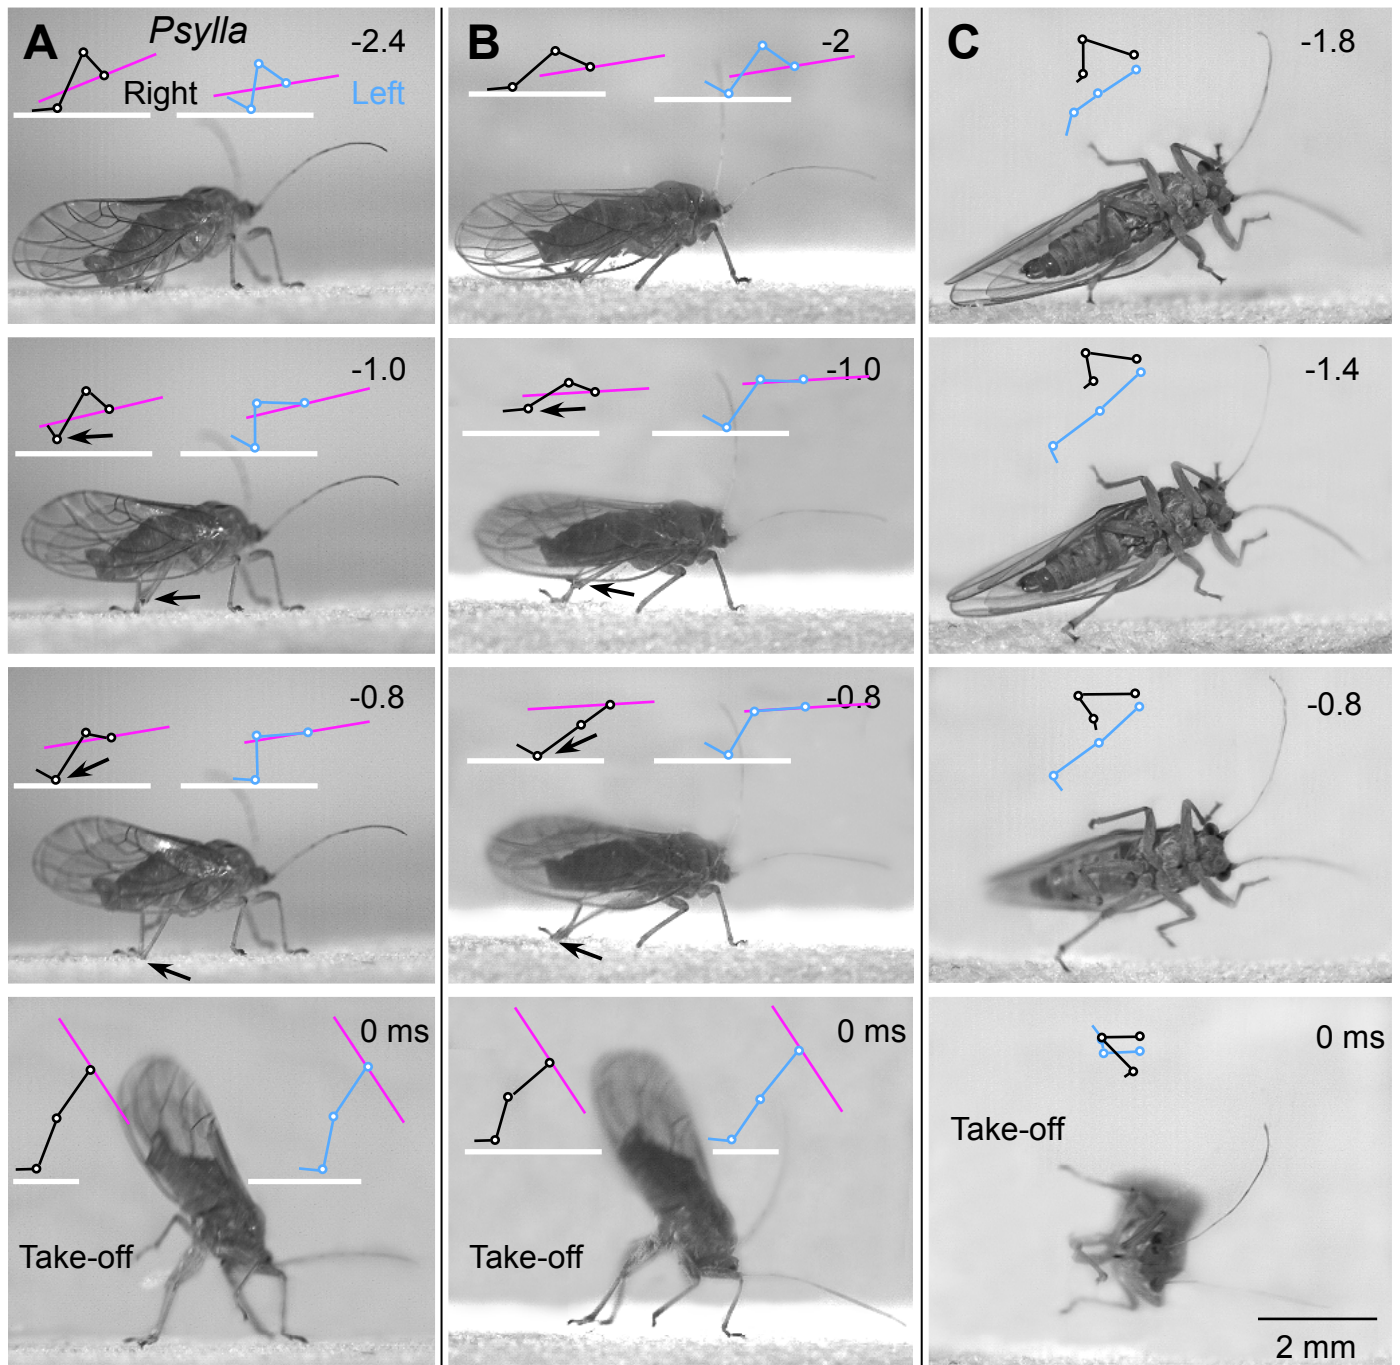

**Figure 9**

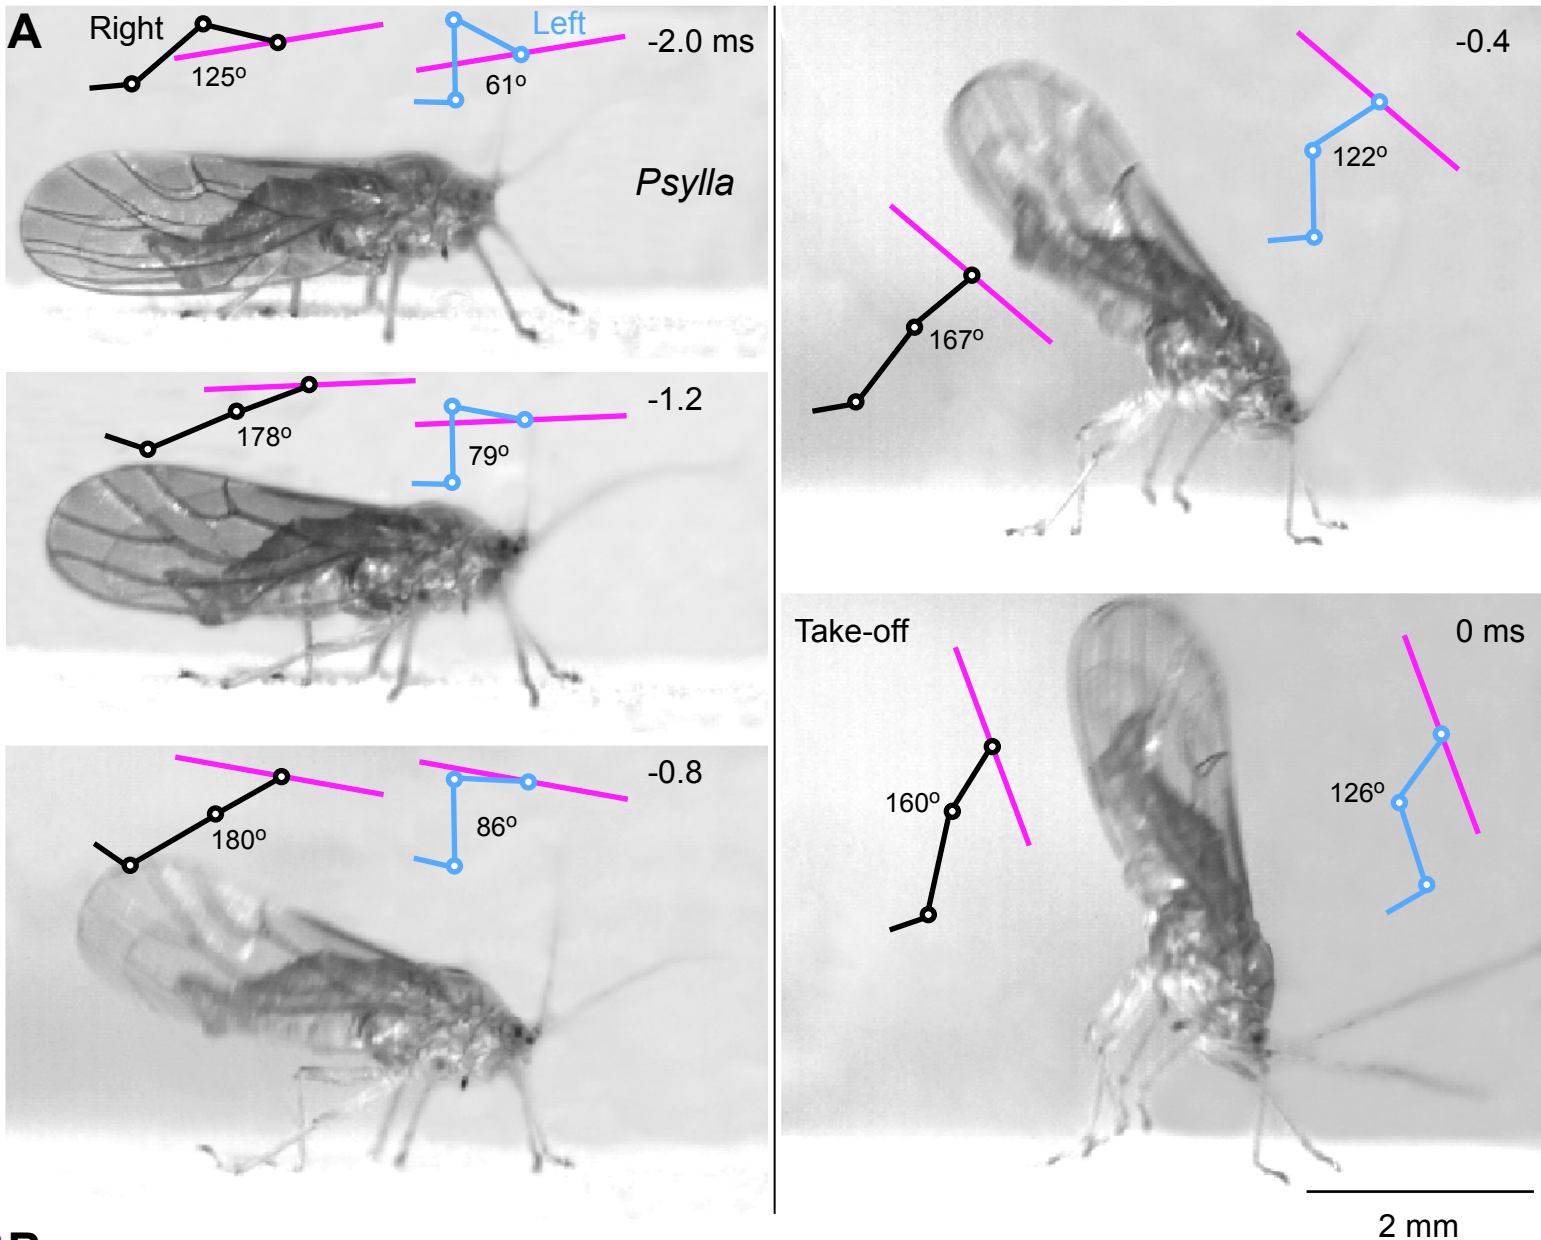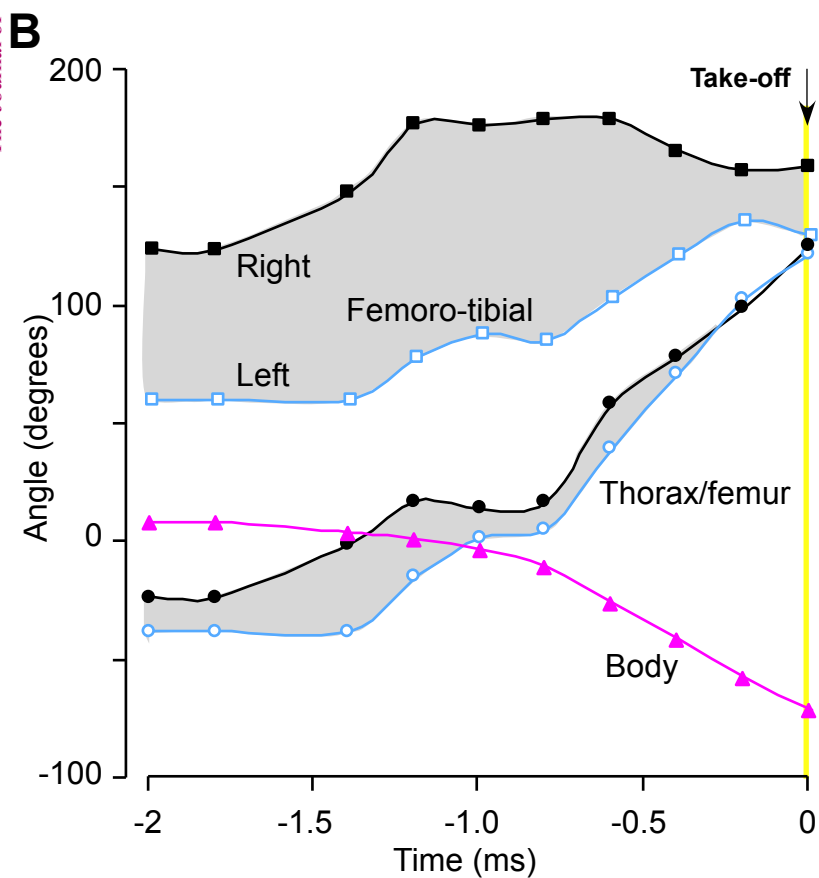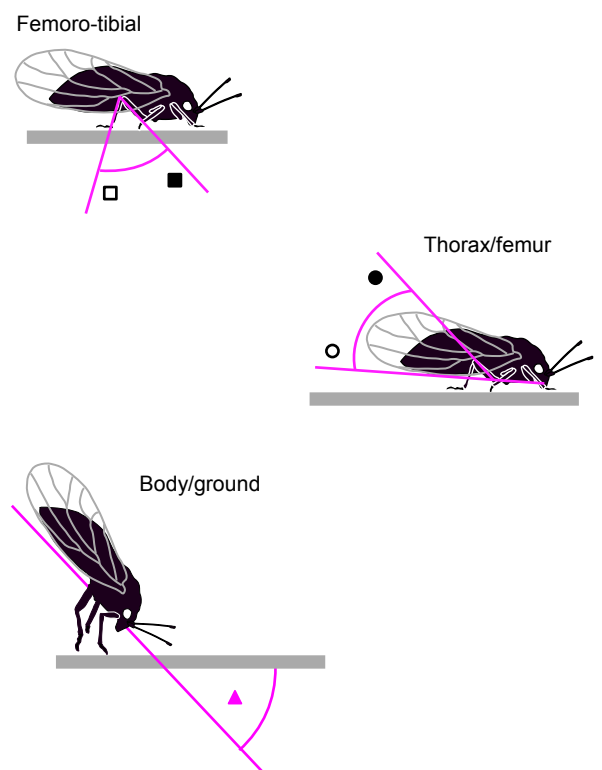

Source: https://cob.silverchair.com/jeb/article-pdf/doi/10.1242/jeb.074682/2035989/jeb_074682.pdf
